# Supplementary material for: Nilotinib interferes with cell cycle, ABC transporters and JAK-STAT signaling pathway in CD34+/lin- cells of patients with chronic phase chronic myeloid leukemia after 12 months of treatment
Source: PLoS One. 2019 Jul 18;14(7):e0218444. doi: 10.1371/journal.pone.0218444 (PMC6638825; doi:10.1371/journal.pone.0218444)
Supplement: S1 Table — (XLSX) [file pone.0218444.s002.xlsx]

## Sheet: S1 Table
S1 Table. Results of differential expression analysis on 78 CML patients at diagnosis vs. 12 months treatment with nilotinib.
HTA-2.0 ProbeID	Gene Symbol	EntrezID	Expression at diagnosis	Expression at 12 months	Fold Change (diagnosis/12 months)	Adjusted p-value
TC04002026.hg.1	---	---	5.20203	4.49358	1.63404	0.0153777
TC04002402.hg.1	ABCA11P	79963	4.62348	4.35594	1.20375	0.036242
TC13000799.hg.1	ABCC4	10257	4.26465	3.98725	1.21201	0.0111504
TC03002064.hg.1	ABCC5	10057	3.65724	3.52645	1.09489	0.0399492
TC01000872.hg.1	ABCD3	5825	4.04218	3.78674	1.1937	0.0313114
TC04000709.hg.1	ABCE1	6059	4.34547	4.09877	1.18649	0.0384107
TC6_cox_hap2000039.hg.1	ABCF1	23	4.63875	4.46875	1.12505	0.0292118
TC6_dbb_hap3000032.hg.1	ABCF1	23	4.63875	4.46875	1.12505	0.0292118
TC6_mann_hap4000034.hg.1	ABCF1	23	4.63875	4.46875	1.12505	0.0292118
TC6_mcf_hap5000026.hg.1	ABCF1	23	4.63875	4.46875	1.12505	0.0292118
TC6_qbl_hap6000032.hg.1	ABCF1	23	4.63875	4.46875	1.12505	0.0292118
TC6_ssto_hap7000032.hg.1	ABCF1	23	4.63875	4.46875	1.12505	0.0292118
TC06000341.hg.1	ABCF1	23	4.66003	4.4994	1.11777	0.039884
TC15000844.hg.1	ABHD2	11057	4.04738	3.87472	1.12713	0.0481429
TC18000402.hg.1	ABHD3	171586	3.36466	3.2103	1.11293	0.0492152
TC07000185.hg.1	---	---	3.73161	3.42961	1.23285	0.0306107
TC18000506.hg.1	ACAA2	10449	4.3845	4.12367	1.19817	0.0432462
TC17001406.hg.1	ACACA	31	3.87942	3.70401	1.12929	0.0235236
TC03002141.hg.1	ACAP2	23527	4.10834	3.90346	1.15259	0.0462745
TC01003897.hg.1	ACBD3	64746	4.56747	4.28254	1.21835	0.0134299
TC17001520.hg.1	ACLY	47	4.37002	4.16991	1.14879	0.0195167
TC02001350.hg.1	ACSL3	2181	3.86627	3.68205	1.1362	0.03698
TC16001441.hg.1	ACSM3	6296	3.94623	3.63896	1.23737	0.038315
TC02000735.hg.1	ACTR3	10096	5.2818	4.97494	1.23701	0.0276307
TC07001031.hg.1	ACTR3B	57180	4.60905	4.38094	1.1713	0.0144397
TC14002244.hg.1	ADAM6	8755	3.11633	3.25559	-1.10134	0.0467256
TC08000298.hg.1	ADAM9	8754	3.96748	3.69877	1.20473	0.0215655
TC08001887.hg.1	ADAM9	8754	4.21073	3.90553	1.23559	0.0241299
TC05002946.hg.1	ADAMTS12	81792	2.02682	2.30566	-1.21323	0.0331118
TC04001277.hg.1	ADAMTS3	9508	3.23785	2.98883	1.1884	0.0124433
TC19001006.hg.1	ADAMTSL5	339366	4.39143	4.53482	-1.10449	0.049693
TC21000785.hg.1	ADARB1	104	4.00551	3.83488	1.12555	0.041639
TC10002389.hg.1	ADARB2	105	2.50617	2.71079	-1.15238	0.0343397
TC06002186.hg.1	ADAT2	134637	4.38302	4.09829	1.21818	0.0159128
TC02003315.hg.1	---	---	4.63616	4.1866	1.36563	0.0139145
TC04002488.hg.1	ADGRA3	166647	3.8816	3.64283	1.17999	0.0259525
TC04001079.hg.1	ADGRA3	166647	3.85626	3.65546	1.14934	0.0431624
TC05002870.hg.1	---	---	2.09234	2.28424	-1.14226	0.0481374
TC05002852.hg.1	---	---	2.23371	2.49892	-1.20181	0.0191844
TC05002863.hg.1	---	---	1.45193	1.69321	-1.18203	0.0434103
TC03002282.hg.1	---	---	3.09471	2.79395	1.23179	0.0265421
TC16001426.hg.1	---	---	4.24957	3.76928	1.39502	0.0204501
TC18000882.hg.1	---	---	1.67679	2.02116	-1.26959	0.00961733
TC10002011.hg.1	---	---	2.79976	2.43204	1.29032	0.0318764
TC10002859.hg.1	---	---	1.93607	2.14182	-1.15328	0.0474644
TC01004738.hg.1	---	---	3.94719	3.60045	1.27168	0.0403322
TC0X002061.hg.1	---	---	3.77445	4.07593	-1.23241	0.0273307
TC05002403.hg.1	---	---	1.41478	1.65871	-1.18421	0.0481289
TC12002202.hg.1	---	---	5.04688	4.43863	1.52441	0.0113898
TC17002168.hg.1	---	---	1.71994	2.06642	-1.27145	0.0159064
TC07003099.hg.1	---	---	4.02249	3.39843	1.54121	0.00994949
TC06000067.hg.1	---	---	1.52382	1.74476	-1.16549	0.0495492
TC04002064.hg.1	AFM	173	1.6071	1.89994	-1.22505	0.018063
TC10001255.hg.1	AGAP4	119016	5.04198	4.68057	1.28468	0.0191543
TC10001240.hg.1	AGAP9	642517	4.58959	4.34451	1.18516	0.0372486
TC10000312.hg.1	AGAP9	642517	4.64335	4.39892	1.18462	0.0406047
TC02001363.hg.1	AGFG1	3267	4.4279	4.19943	1.17159	0.0204756
TC01000895.hg.1	AGL	178	3.55263	3.29085	1.19896	0.0148654
TC06002284.hg.1	AGPAT4	56895	3.51134	3.34753	1.12024	0.0290928
TC08000022.hg.1	AGPAT5	55326	4.29719	3.99359	1.23422	0.0159824
TC03000798.hg.1	AGTR1	185	3.64996	3.4356	1.16019	0.0407611
TC01004062.hg.1	AHCTF1	25909	4.3315	3.98756	1.26922	0.0105344
TC02002477.hg.1	AHCTF1P1	285116	4.16086	3.77853	1.30344	0.00966144
TC06002136.hg.1	AHI1	54806	3.57894	3.35334	1.16927	0.0130265
TC01003868.hg.1	AIDA	64853	4.13681	3.92741	1.15621	0.0348781
TC17002007.hg.1	---	---	4.2047	4.49543	-1.22325	0.0276335
TC04002024.hg.1	---	---	4.23039	3.85113	1.30068	0.049186
TC02004165.hg.1	---	---	2.05809	2.30276	-1.18482	0.0289288
TC01004497.hg.1	---	---	1.45691	1.84842	-1.31176	0.0099375
TC09002733.hg.1	---	---	4.01697	3.58654	1.34764	0.0188333
TC02001479.hg.1	---	---	3.50514	3.16462	1.26622	0.00952896
TC19002452.hg.1	---	---	3.48382	3.1519	1.25869	0.0376066
TC05002019.hg.1	---	---	3.43513	3.07702	1.28175	0.0176835
TC17002312.hg.1	---	---	4.62166	4.26491	1.28054	0.00935433
TC02004863.hg.1	---	---	3.2456	3.50627	-1.19804	0.0317272
TC01005543.hg.1	---	---	5.26544	5.63933	-1.29585	0.030068
TC0X001307.hg.1	AKAP16BP	---	2.43526	2.78556	-1.27483	0.0205385
TC06001929.hg.1	AKIRIN2	55122	4.06462	3.77983	1.21823	0.0296914
TC05002390.hg.1	---	---	1.88209	2.14923	-1.20341	0.0189625
TC08002051.hg.1	---	---	4.96618	4.51962	1.36279	0.0096612
TC10002620.hg.1	---	---	4.66578	4.42075	1.18512	0.036795
TC09001211.hg.1	ALDH1A1	216	5.13041	4.72835	1.32139	0.0113519
TC01000719.hg.1	ALG6	29929	3.47323	3.2448	1.17156	0.0331646
TC0X001829.hg.1	---	---	3.86699	3.45538	1.33017	0.0174061
TC02002211.hg.1	ANAPC1	64682	4.51496	4.22061	1.22633	0.0100902
TC02000530.hg.1	ANAPC1	64682	4.50169	4.23908	1.19965	0.0343396
TC02003380.hg.1	ANAPC1P1	100286979	4.43967	4.11112	1.25575	0.0128428
TC02000527.hg.1	ANAPC1P1	100286979	4.36445	4.13356	1.17356	0.0469493
TC04000176.hg.1	ANAPC4	29945	3.77274	3.51142	1.19858	0.0126805
TC12003221.hg.1	ANAPC7	51434	4.07306	3.85892	1.16001	0.0388656
TC08000902.hg.1	ANGPT2	285	3.76689	3.46034	1.23674	0.00965241
TC09001599.hg.1	ANGPTL2	23452	3.60741	3.76226	-1.1133	0.0497263
TC08001171.hg.1	ANK1	286	4.37203	4.17612	1.14545	0.0241223
TC05000726.hg.1	ANKHD1	54882	4.30541	4.0601	1.18535	0.017625
TC01002771.hg.1	ANKRD13C	81573	3.41733	3.18509	1.17465	0.0408703
TC04001279.hg.1	ANKRD17	26057	4.3637	4.1161	1.18723	0.0306265
TC19001388.hg.1	ANKRD27	84079	4.157	3.93029	1.17016	0.0298545
TC02000589.hg.1	ANKRD36	57730	5.19477	4.85815	1.26279	0.0332151
TC02002120.hg.1	ANKRD36B	375248	4.77806	4.51407	1.2008	0.0418417
TC02002098.hg.1	ANKRD36C	400986	5.15331	4.81263	1.26636	0.0307647
TC06000797.hg.1	ANKRD6	22881	3.31392	3.4294	-1.08333	0.0361789
TC07000235.hg.1	ANLN	54443	4.12342	3.81634	1.2372	0.00955923
TC10001408.hg.1	ANXA7	310	4.79669	4.56599	1.1734	0.0388938
TC17000399.hg.1	AP2B1	163	4.59985	4.35079	1.18843	0.0182533
TC15002699.hg.1	AP3S2	10239	4.10726	3.83833	1.20491	0.0285602
TC01003008.hg.1	AP4B1	10717	3.59355	3.45751	1.09889	0.0465634
TC15000399.hg.1	AP4E1	23431	3.41129	3.15194	1.19695	0.0168959
TC02004095.hg.1	APOB	338	1.58203	1.86794	-1.21918	0.0306293
TC19000634.hg.1	APOC1	341	5.26566	4.86673	1.31853	0.0123521
TC04002952.hg.1	AREG	---	3.76636	4.5725	-1.74853	0.0372593
TC04002953.hg.1	AREG		3.77505	4.57171	-1.73708	0.0372593
TC14001310.hg.1	AREL1	9870	4.03034	3.86033	1.12506	0.0331902
TC03001495.hg.1	ARF4	378	4.80235	4.55743	1.18503	0.0376186
TC04000766.hg.1	ARFIP1	27236	3.64812	3.42049	1.17091	0.0273131
TC06000983.hg.1	ARG1	383	3.57115	3.3027	1.20452	0.0473949
TC13000861.hg.1	ARGLU1	55082	5.29172	5.01432	1.21201	0.0400976
TC04000733.hg.1	ARHGAP10	79658	3.57931	3.36554	1.15972	0.00961371
TC15000223.hg.1	ARHGAP11A	9824	4.37793	4.01062	1.28995	0.0133696
TC15002760.hg.1	ARHGAP11B	89839	4.25374	3.87425	1.30088	0.0105344
TC10002952.hg.1	ARHGAP19	84986	3.97988	3.7251	1.19315	0.0161667
TC10002791.hg.1	ARHGAP19-SLIT1	100533184	4.21134	4.00269	1.1556	0.0240201
TC11001102.hg.1	ARHGEF12	23365	4.05443	3.69348	1.28427	0.0278919
TC01003992.hg.1	ARID4B-IT1		6.32517	6.63765	-1.24184	0.0407922
TC02002429.hg.1	ARL5A	26225	3.7147	3.52032	1.14423	0.0388497
TC10000140.hg.1	ARL5B	221079	4.32762	3.99657	1.25793	0.0181161
TC02003640.hg.1	ARL6IP6	151188	3.72837	3.30533	1.34075	0.00961358
TC02000942.hg.1	ARL6IP6	151188	3.48954	3.28301	1.15391	0.0454922
TC08001280.hg.1	ARMC1	55156	4.22275	3.93362	1.2219	0.0361518
TC03000743.hg.1	ARMC8	25852	4.07002	3.77069	1.23057	0.0159846
TC01003618.hg.1	ARPC5	10092	3.80378	4.05638	-1.19136	0.0324699
TC01000552.hg.1	ARTN	9048	4.46991	4.6348	-1.12108	0.0432597
TC08001641.hg.1	ASAP1	50807	3.74902	3.58005	1.12425	0.0392567
TC17000033.hg.1	ASPA	443	2.15202	2.31939	-1.12301	0.0403104
TC01006023.hg.1	ASPM	259266	5.03639	4.54691	1.40394	0.0095
TC01003662.hg.1	ASPM	259266	4.10762	3.69699	1.32927	0.0101095
TC12001330.hg.1	ASUN	55726	4.2284	3.87075	1.28133	0.00959259
TC08001584.hg.1	ATAD2	29028	4.16198	3.88689	1.21007	0.0405606
TC17000355.hg.1	ATAD5	79915	4.1615	3.82629	1.26156	0.0104608
TC12000193.hg.1	ATF7IP	55729	4.33132	4.09701	1.17635	0.0286993
TC02001415.hg.1	ATG16L1	55054	3.51224	3.36746	1.10556	0.0271158
TC14001484.hg.1	ATG2B	55102	3.96354	3.66292	1.23167	0.00972619
TC14002145.hg.1	ATG2B	55102	4.24939	3.87879	1.29289	0.0166269
TC11000980.hg.1	ATM	472	3.99237	3.68482	1.2376	0.0108996
TC03002133.hg.1	ATP13A3	79572	4.23082	3.75883	1.38702	0.0372593
TC03000766.hg.1	ATP1B3	483	4.38154	4.13871	1.18331	0.0260418
TC21000938.hg.1	ATP5O	539	6.12839	5.57934	1.46312	0.0399146
TC0X000424.hg.1	ATP7A	538	3.5636	3.27129	1.2246	0.016035
TC13000684.hg.1	ATP7B	540	3.79672	3.61182	1.13674	0.0252064
TC06001293.hg.1	ATXN1	6310	3.53161	3.37995	1.11084	0.0450608
TC01002381.hg.1	AUNIP	79000	4.09553	3.87602	1.16435	0.0322038
TC0X001108.hg.1	AWAT2	158835	2.88829	3.06559	-1.13076	0.0124266
TC12002765.hg.1	---	---	3.60506	3.83065	-1.16926	0.00958166
TC08001501.hg.1	AZIN1	51582	4.68891	4.33708	1.27617	0.00928889
TC02000357.hg.1	B3GNT2	10678	4.58958	4.20771	1.30303	0.00921368
TC11003368.hg.1	BACE1	23621	4.73909	5.04689	-1.23782	0.0216733
TC08000287.hg.1	BAG4	9530	4.10768	3.84423	1.20035	0.00972376
TC17000929.hg.1	BAHCC1	57597	4.42082	4.57188	-1.11038	0.0192381
TC11001190.hg.1	BARX2	8538	3.80987	4.00506	-1.14488	0.0271155
TC14001030.hg.1	BAZ1A	11177	4.33413	4.0047	1.25651	0.0104874
TC07001499.hg.1	BAZ1B	9031	4.70815	4.41296	1.22704	0.0159922
TC16001134.hg.1	BBS2	583	3.67026	3.50071	1.12471	0.0476483
TC19002176.hg.1	---	---	4.62719	4.06293	1.47863	0.0193891
TC02001002.hg.1	---	---	5.6037	5.98973	-1.30679	0.0165803
TC11000868.hg.1	---	---	5.75247	6.12307	-1.29289	0.0398427
TC06003043.hg.1	---	---	1.73665	1.98348	-1.18659	0.0441754
TC10002057.hg.1	---	---	3.16399	3.41124	-1.18694	0.0334197
TC13001304.hg.1	---	---	1.73776	1.99321	-1.19371	0.0176537
TC06002771.hg.1	---	---	3.79289	3.4652	1.255	0.0277273
TC09002489.hg.1	---	---	4.54789	4.17272	1.29699	0.0186794
TC16001973.hg.1	---	---	1.88239	2.11249	-1.17292	0.0418379
TC03002877.hg.1	---	---	3.59327	3.2624	1.25777	0.00960218
TC09001082.hg.1	---	---	4.17914	3.72256	1.37229	0.00968489
TC01004618.hg.1	---	---	2.86797	3.11214	-1.18441	0.0384762
TC07002518.hg.1	BCAP29	55973	4.01388	3.73666	1.21186	0.0368121
TC01006365.hg.1	BCAS2	10286	4.79523	4.43533	1.28334	0.0391212
TC20000408.hg.1	BCAS4	55653	4.64034	4.89139	-1.19007	0.00968051
TC11002355.hg.1	BCL9L	283149	4.48291	4.64239	-1.11688	0.0280177
TC06002143.hg.1	BCLAF1	9774	4.89661	4.56323	1.25997	0.036339
TC14002311.hg.1	BDKRB1	623	3.36033	3.50124	-1.1026	0.0491934
TC0X001239.hg.1	BEX2	84707	4.6089	4.9098	-1.23191	0.0150041
TC07002476.hg.1	BHLHA15	168620	5.02464	5.41212	-1.30811	0.0095203
TC02000213.hg.1	BIRC6	57448	4.08586	3.82868	1.19513	0.0239783
TC15000868.hg.1	BLM	641	3.95396	3.71381	1.18112	0.0430772
TC10001555.hg.1	BLNK	29760	3.42758	3.59927	-1.12638	0.0408161
TC01001475.hg.1	BLZF1	8548	4.19782	3.879	1.24731	0.0328848
TC04000440.hg.1	BMP2K	55589	4.50369	4.14705	1.28044	0.00944792
TC10000266.hg.1	BMS1	9790	4.76981	4.46525	1.23504	0.0107966
TC14000854.hg.1	---	---	3.98857	3.53767	1.36689	0.0193571
TC14000028.hg.1	---	---	3.94903	3.50289	1.36239	0.0217551
TC22000002.hg.1	---	---	4.26636	3.6463	1.53693	0.0347586
TC10002707.hg.1	BMS1P4	729096	4.58312	4.35974	1.16747	0.0457567
TC10001232.hg.1	BMS1P5	728053	4.59815	4.31055	1.22061	0.0191207
TC15001503.hg.1	BNIP2	663	4.56013	4.27268	1.22048	0.0364841
TC02002952.hg.1	BOK-AS1	100379249	4.44056	4.82244	-1.30304	0.0421287
TC16002102.hg.1	BOLA2	552900	5.36379	5.05998	1.2344	0.037021
TC06002732.hg.1	BRD2	6046	4.74827	4.50581	1.18301	0.0314927
TC17001769.hg.1	BRIP1	83990	4.13112	3.83144	1.23087	0.0188427
TC14000225.hg.1	BRMS1L	84312	3.20098	3.00084	1.14881	0.0416254
TC17001855.hg.1	BTBD17	388419	4.16308	4.35136	-1.1394	0.0485624
TC14002128.hg.1	BTBD7	55727	3.62954	3.43192	1.1468	0.0325145
TC0X002155.hg.1	BTK	695	4.36095	3.92288	1.35479	0.0278024
TC02002204.hg.1	BUB1	699	3.89834	3.68695	1.15781	0.0413059
TC10000900.hg.1	BUB3	9184	4.33337	4.03725	1.22784	0.0158974
TC07002918.hg.1	---	---	3.3898	3.02473	1.28794	0.0384622
TC18000886.hg.1	---	---	2.7447	2.96734	-1.16687	0.0324578
TC07000110.hg.1	BZW2	28969	4.65113	4.40923	1.18255	0.0407278
TC07002162.hg.1	BZW2	28969	4.38821	4.09353	1.22661	0.0417987
TC11000576.hg.1	C11orf84	144097	4.17732	4.39463	-1.16256	0.0391108
TC12003052.hg.1	C12orf73	728568	3.54906	3.33088	1.16326	0.0241202
TC15000253.hg.1	C15orf41	84529	3.94009	3.7478	1.14258	0.04277
TC16001319.hg.1	C16orf74	404550	4.16083	4.43299	-1.20761	0.0269901
TC18000187.hg.1	C18orf54	162681	3.42133	3.18324	1.17943	0.0397504
TC19000126.hg.1	C19orf45	374877	3.46155	3.61814	-1.11465	0.0369593
TC01001604.hg.1	C1orf27	54953	3.94979	3.69582	1.19249	0.0447794
TC01005859.hg.1	C1orf61	10485	2.64048	2.91344	-1.20829	0.0111781
TC20000475.hg.1	C20orf197	284756	3.61423	3.35771	1.19459	0.00960215
TC11002076.hg.1	C2CD3	26005	3.67406	3.53529	1.10096	0.0343453
TC15001511.hg.1	C2CD4B	388125	3.833	4.11998	-1.22008	0.0299929
TC03003032.hg.1	C3orf17	25871	4.66422	4.29945	1.28767	0.00956571
TC03001655.hg.1	C3orf17	25871	4.25288	4.02554	1.17068	0.0416347
TC03000781.hg.1	C3orf58	205428	3.76084	3.61556	1.10595	0.0481157
TC03000872.hg.1	C3orf80	401097	3.05344	3.33449	-1.21508	0.0215657
TC6_mcf_hap5000068.hg.1	C4B	721	3.77793	4.63567	-1.8122	0.0103881
TC04000577.hg.1	C4orf32	132720	4.24897	3.94979	1.23044	0.0488601
TC08002597.hg.1	C8orf58	541565	4.5412	4.71557	-1.12848	0.0468588
TC08001407.hg.1	C8orf88	100127983	4.09486	3.77677	1.24668	0.0146264
TC09001472.hg.1	C9orf152	401546	3.41675	3.55899	-1.10361	0.0464418
TC09000845.hg.1	C9orf173	441476	4.73218	4.975	-1.18331	0.0408738
TC02001379.hg.1	CAB39	51719	3.96484	3.69499	1.20568	0.0431728
TC07000782.hg.1	CALU	813	4.49629	4.22534	1.2066	0.0281893
TC10001787.hg.1	CALY	50632	4.86876	5.08859	-1.16459	0.0258356
TC10002711.hg.1	CAMK2G	818	3.9906	4.20666	-1.16155	0.0357708
TC01004166.hg.1	CAMTA1	23261	5.56751	5.19344	1.296	0.0157751
TC11000324.hg.1	CAPRIN1	4076	5.31295	5.0421	1.20652	0.0481152
TC12002818.hg.1	CAPRIN2	65981	3.86466	3.44162	1.34074	0.0265128
TC12001355.hg.1	CAPRIN2	65981	3.9402	3.54717	1.31315	0.0372593
TC01000990.hg.1	CAPZA1	829	5.04903	4.70811	1.26657	0.0204302
TC01004629.hg.1	CAPZA1	829	5.66059	5.24765	1.3314	0.0463812
TC07000723.hg.1	CAPZA2	830	4.5828	4.25852	1.25204	0.0199186
TC0X002040.hg.1	CASK	8573	2.45425	2.69418	-1.18094	0.0434732
TC02001176.hg.1	CASP10	843	3.73591	3.54339	1.14275	0.0297867
TC05002527.hg.1	CAST	831	4.7887	4.3856	1.32235	0.0129043
TC19000629.hg.1	CBLC	23624	4.14756	4.36929	-1.16613	0.0196352
TC07000696.hg.1	CBLL1	79872	4.00782	3.76467	1.18357	0.0145413
TC07002520.hg.1	CBLL1	79872	4.7582	4.26402	1.40852	0.0175484
TC04001723.hg.1	CBR4	84869	3.85682	3.6183	1.17978	0.0123862
TC02000725.hg.1	CBWD1	150472	4.85814	4.55428	1.23444	0.0406701
TC09000864.hg.1	CBWD1	55871	4.75281	4.47308	1.21397	0.0427826
TC09000247.hg.1	CBWD5	220869	4.86186	4.50424	1.28131	0.0268911
TC09001181.hg.1	CBWD5	220869	4.62106	4.32269	1.22976	0.039761
TC09000308.hg.1	CBWD5	220869	4.96761	4.64302	1.25231	0.04122
TC02005048.hg.1	CCDC141	285025	2.24921	2.3832	-1.09733	0.0380075
TC17000252.hg.1	CCDC144CP		3.72684	3.47362	1.19187	0.0409174
TC01004530.hg.1	CCDC18	343099	3.98583	3.66116	1.25238	0.0421516
TC01003456.hg.1	CCDC190	339512	3.13067	3.2824	-1.1109	0.0484406
TC01000557.hg.1	CCDC24	149473	3.9677	4.10877	-1.10272	0.0180794
TC08002635.hg.1	CCDC26	137196	4.00392	3.6235	1.30172	0.0116637
TC11001508.hg.1	CCDC34	91057	4.7424	4.50844	1.17606	0.0441867
TC10001317.hg.1	CCDC6	8030	4.58708	4.36018	1.17031	0.0473712
TC09001044.hg.1	CCL19	6363	4.59138	4.79356	-1.15043	0.0313016
TC04001516.hg.1	CCNA2	890	4.26269	3.89099	1.29387	0.0117731
TC05000298.hg.1	CCNB1	891	4.58172	4.25275	1.25612	0.0171343
TC05000906.hg.1	CCNG1	900	4.48197	4.10671	1.29708	0.0195596
TC02003598.hg.1	CCNT2	905	4.4385	4.10415	1.26081	0.0217453
TC02000878.hg.1	CCNT2	905	4.30221	4.05337	1.18825	0.0379373
TC05000072.hg.1	CCT5	22948	4.28309	4.00503	1.21256	0.0338375
TC07000398.hg.1	CCT6P1	643253	4.12274	3.83716	1.2189	0.0208208
TC07002372.hg.1	CCT6P3	643180	4.24829	3.9278	1.24875	0.0175006
TC07000388.hg.1	CCT6P3	643180	4.31671	4.03755	1.21349	0.0203507
TC19000775.hg.1	CD33	945	4.15736	4.00857	1.10863	0.0416172
TC07000509.hg.1	CD36	948	3.2872	2.92663	1.28394	0.0347586
TC04000145.hg.1	CD38	952	4.70603	4.43194	1.20923	0.018858
TC01001741.hg.1	CD46	4179	4.72588	4.39478	1.25798	0.0359452
TC03001629.hg.1	CD47	961	5.27528	4.79983	1.39034	0.00976331
TC05001936.hg.1	CD74	972	5.21309	5.43716	-1.16803	0.0427421
TC11001279.hg.1	CD81-AS1	101927682	3.36078	3.5388	-1.13133	0.0485879
TC17001621.hg.1	CDC27	996	4.81111	4.46626	1.27002	0.00953114
TC06000617.hg.1	CDC5L	988	4.78905	4.42541	1.28666	0.015019
TC17000495.hg.1	CDC6	990	4.09539	3.82229	1.2084	0.0179979
TC16000559.hg.1	CDH1	999	4.29604	4.07409	1.16631	0.0188371
TC17000474.hg.1	CDK12	51755	4.71349	4.44026	1.20851	0.0129169
TC07002274.hg.1	CDK13	8621	3.15044	2.74843	1.32135	0.00975
TC01001710.hg.1	CDK18	5129	4.09562	4.23682	-1.10282	0.0212971
TC05000301.hg.1	CDK7	1022	3.77948	3.55436	1.16888	0.0358875
TC13000974.hg.1	CDK8	1024	4.01962	3.63643	1.30422	0.0485667
TC14000316.hg.1	CDKN3	1033	3.73832	3.44124	1.22866	0.0449832
TC19002489.hg.1	CEACAM4	1089	4.65284	4.85378	-1.14945	0.040118
TC19001559.hg.1	CEACAM4	1089	4.44012	4.60319	-1.11967	0.043153
TC02001741.hg.1	CEBPZ	10153	4.95813	4.62075	1.26346	0.0386338
TC22001187.hg.1	CECR3	27442	4.01026	3.46156	1.46276	0.0190058
TC11001741.hg.1	CELF1	10658	4.20072	4.00846	1.14255	0.0281257
TC09002316.hg.1	CELP	1057	3.82521	4.0157	-1.14115	0.0427933
TC03000283.hg.1	CELSR3-AS1	102724368	4.17329	4.41971	-1.18626	0.0258583
TC11001246.hg.1	CEND1	51286	4.51684	4.75352	-1.17828	0.0249165
TC04001436.hg.1	CENPE	1062	3.79012	3.44874	1.26697	0.0146394
TC01001791.hg.1	CENPF	1063	4.74875	4.40071	1.27283	0.0218777
TC0X000475.hg.1	CENPI	2491	3.3896	3.20255	1.13843	0.0407609
TC05001408.hg.1	CENPK	64105	4.06002	3.71066	1.274	0.0134143
TC04001808.hg.1	CENPU	79682	4.44524	4.03065	1.33292	0.00953889
TC0X001045.hg.1	CENPVP1	389857	3.52001	3.77086	-1.18991	0.0414967
TC0X000294.hg.1	CENPVP2	441495	3.52001	3.77086	-1.18991	0.0414967
TC15001337.hg.1	CEP152	22995	4.11904	3.73496	1.30502	0.0125149
TC18000070.hg.1	CEP192	55125	4.02972	3.79572	1.17609	0.0415658
TC11000908.hg.1	CEP295	85459	3.87662	3.6174	1.19683	0.047471
TC01004347.hg.1	CFAP57	149465	2.7277	2.86878	-1.10273	0.0359094
TC01006291.hg.1	CFH	3075	3.81533	3.43133	1.30495	0.00969524
TC01006294.hg.1	CFHR1	3078	3.21178	3.04745	1.12065	0.0465803
TC19002716.hg.1	CGB1	114335	3.5762	3.81844	-1.18283	0.0244202
TC19000723.hg.1	CGB5	93659	3.59514	3.81147	-1.16177	0.0369732
TC19002715.hg.1	CGB8	94115	3.9084	4.13523	-1.17026	0.0177046
TC10002936.hg.1	CHAT	1103	4.13838	4.27766	-1.10135	0.0360877
TC07001878.hg.1	CHCHD3	54927	4.62313	4.37615	1.18672	0.0398509
TC08000412.hg.1	CHD7	55636	2.9722	2.83512	1.09968	0.0388876
TC14000917.hg.1	CHD8	57680	3.96206	3.74345	1.16361	0.0249027
TC12002538.hg.1	CHPT1	56994	5.18095	4.66767	1.42729	0.012642
TC0X001278.hg.1	CHRDL1	91851	2.81536	2.97258	-1.11514	0.0401518
TC11001885.hg.1	CHRM1	1128	4.13465	4.32273	-1.13925	0.0419021
TC11001719.hg.1	CHRM4	1132	4.23929	4.65192	-1.33111	0.0100859
TC10002931.hg.1	CHUK	1147	3.37902	3.15758	1.1659	0.0392981
TC04000529.hg.1	CISD2	493856	4.86484	4.51974	1.27024	0.0109355
TC01004760.hg.1	CKS1B	1163	5.43629	5.10497	1.25816	0.0324615
TC03001277.hg.1	CLASP2	23122	3.94251	3.6926	1.18913	0.0105434
TC08001787.hg.1	CLDN23	137075	3.5511	3.81748	-1.20279	0.0384004
TC19001460.hg.1	CLIP3	25999	4.46492	4.65829	-1.14343	0.0317744
TC01002500.hg.1	CLSPN	63967	3.92391	3.63607	1.22081	0.0123797
TC17000725.hg.1	CLTC	1213	4.08541	3.70309	1.30344	0.0100828
TC12000237.hg.1	CMAS	55907	4.60244	4.29022	1.24161	0.041831
TC19000027.hg.1	CNN2	1265	4.67661	4.89656	-1.16469	0.0325688
TC16001154.hg.1	CNOT1	23019	4.7239	4.40559	1.24687	0.0164431
TC02000615.hg.1	CNOT11	55571	4.61958	4.40223	1.1626	0.0310183
TC07001327.hg.1	COA1	55744	3.49848	3.33271	1.12177	0.0388506
TC07001743.hg.1	COG5	10466	3.92367	3.6762	1.18713	0.0266119
TC21000253.hg.1	COL6A2	1292	4.63701	4.82121	-1.13619	0.0370157
TC01002503.hg.1	COL8A2	1296	4.17382	4.36286	-1.14001	0.039364
TC01003400.hg.1	COPA	1314	4.27961	4.07704	1.15074	0.0447591
TC11003473.hg.1	COPB1	1315	4.66337	4.33432	1.25618	0.0259018
TC03003113.hg.1	COPB2	9276	4.73397	4.3892	1.26995	0.0247569
TC03001832.hg.1	COPB2	9276	4.49924	4.23329	1.20243	0.0392697
TC15001342.hg.1	COPS2	9318	4.49675	4.13073	1.28879	0.0174337
TC04001278.hg.1	COX18	285521	4.12541	3.9307	1.14449	0.0292727
TC03000799.hg.1	CPB1	1360	2.92163	2.74631	1.12921	0.0300775
TC08002026.hg.1	CPQ	10404	3.97745	3.73763	1.18084	0.0436538
TC14000568.hg.1	CPSF2	53981	4.42359	4.06888	1.27873	0.0122934
TC01001738.hg.1	CR1	1378	3.76654	3.53345	1.17535	0.00962007
TC01001740.hg.1	CR1L	1379	3.15189	3.01093	1.10264	0.0415614
TC17002283.hg.1	---	---	3.55937	3.25279	1.23677	0.0449
TC02003701.hg.1	---	---	1.61296	1.86022	-1.18695	0.0485787
TC06003653.hg.1	---	---	4.5352	4.29174	1.18382	0.036825
TC06003866.hg.1	---	---	3.60266	3.13458	1.38327	0.00963298
TC07002108.hg.1	---	---	5.17179	4.80183	1.29232	0.0336996
TC04002557.hg.1	---	---	3.61571	3.82653	-1.15735	0.036387
TC07002203.hg.1	---	---	5.96295	5.52343	1.35615	0.0423035
TC11002722.hg.1	---	---	5.44018	5.16605	1.20926	0.0497994
TC08002294.hg.1	---	---	4.03643	3.76499	1.20702	0.040149
TC17002430.hg.1	---	---	5.97927	5.50829	1.38605	0.0265551
TC06002549.hg.1	---	---	2.69863	2.37534	1.25118	0.0454761
TC09002369.hg.1	---	---	4.21093	4.55972	-1.2735	0.0117418
TC18000895.hg.1	---	---	4.90103	4.50431	1.31651	0.0103556
TC02003441.hg.1	---	---	4.70286	4.22809	1.3897	0.0160467
TC07002452.hg.1	---	---	4.28564	3.91465	1.29324	0.0168808
TC14001770.hg.1	---	---	2.93931	2.54684	1.31264	0.0135646
TC0X002150.hg.1	---	---	5.80661	5.4794	1.25458	0.0494681
TC12002644.hg.1	---	---	4.09127	3.74367	1.27244	0.0207922
TC16002002.hg.1	---	---	3.21869	3.37167	-1.11186	0.0401036
TC02004433.hg.1	---	---	2.54728	2.36391	1.13554	0.0359638
TC07002870.hg.1	CRHR2	1395	4.83541	5.09855	-1.20009	0.0239969
TC07001252.hg.1	CRHR2	1395	4.02057	4.15304	-1.09617	0.0414903
TC20000065.hg.1	CRLS1	54675	4.2861	4.01163	1.20955	0.00958974
TC12001925.hg.1	CRY1	1407	3.83975	3.52084	1.24739	0.014186
TC20000384.hg.1	CSE1L	1434	4.63614	4.24776	1.30892	0.0193078
TC05001924.hg.1	CSNK1A1	1452	4.30662	4.07535	1.17387	0.0360887
TC20001369.hg.1	CSNK2A1	1457	5.58844	5.16717	1.33911	0.0145912
TC20000542.hg.1	CSNK2A1	1457	5.28793	5.02196	1.20244	0.0388525
TC11003057.hg.1	CSNK2A3	283106	4.4386	4.11786	1.24897	0.0251855
TC08000447.hg.1	CSPP1	79848	4.16011	3.91648	1.18397	0.0190918
TC03001302.hg.1	CSRNP1	64651	4.14498	4.31602	-1.12587	0.0476113
TC20000719.hg.1	CST2	1470	4.01548	4.21767	-1.15044	0.0414173
TC07001974.hg.1	CTAGE6	340307	2.91866	3.18805	-1.20529	0.0336985
TC10002624.hg.1	CTGLF12P	414224	5.22325	4.80559	1.33576	0.0401378
TC10001258.hg.1	CTGLF12P	414224	5.17738	4.76599	1.32997	0.0440289
TC09002062.hg.1	CTSL	1514	3.65046	3.40923	1.182	0.0440305
TC02002826.hg.1	CUL3	8452	4.25348	4.00355	1.18915	0.0326237
TC04000408.hg.1	CXCL8	3576	3.74003	3.28795	1.36801	0.0153067
TC08001275.hg.1	CYP7B1	9420	3.81817	3.4547	1.28652	0.0160857
TC14001714.hg.1	DAAM1	23002	3.91185	3.61455	1.22884	0.0110798
TC14000356.hg.1	DAAM1	23002	3.77091	3.49406	1.21154	0.0118506
TC07000524.hg.1	DBF4	10926	3.88334	3.63343	1.18913	0.0222532
TC08000648.hg.1	DCAF13	25879	4.06072	3.77319	1.22055	0.0326872
TC02003686.hg.1	DCAF17	80067	3.67043	3.41142	1.19665	0.0191842
TC02001020.hg.1	DCAF17	80067	3.79481	3.61177	1.13527	0.0217291
TC01001463.hg.1	DCAF6	55827	4.22694	3.94751	1.21372	0.00968
TC0X000131.hg.1	DCAF8L2	347442	2.27153	2.46661	-1.14478	0.0456021
TC05000535.hg.1	DCP2	167227	4.30329	4.02793	1.2103	0.0123271
TC05002568.hg.1	DCP2	167227	4.57721	4.26351	1.24289	0.0173811
TC05001943.hg.1	DCTN4	51164	4.18204	3.98357	1.14748	0.0468974
TC16001458.hg.1	DCTN5	84516	4.98071	4.70226	1.21289	0.0445303
TC11002240.hg.1	DCUN1D5	84259	4.36796	3.98993	1.29957	0.0175484
TC11001851.hg.1	DDB1	1642	4.23711	4.06003	1.13059	0.0344012
TC02000089.hg.1	DDX1	1653	5.05996	4.70598	1.27808	0.0287869
TC11000981.hg.1	DDX10	1662	4.15574	3.9105	1.18529	0.0357499
TC12000286.hg.1	DDX11	1663	4.09786	3.95911	1.10095	0.0396544
TC10000651.hg.1	DDX18P6	---	3.37584	3.06607	1.23951	0.0190398
TC01000981.hg.1	DDX20	11218	3.75871	3.49211	1.20297	0.00998489
TC10000413.hg.1	DDX21	9188	4.79632	4.465	1.25816	0.0212893
TC12001458.hg.1	DDX23	9416	4.21371	3.99614	1.16277	0.0295964
TC17000771.hg.1	DDX42	11325	4.50571	4.16084	1.27004	0.00938384
TC10000412.hg.1	DDX50	79009	4.08165	3.82512	1.1946	0.0408543
TC08002630.hg.1	DEFA1B	1667	7.11095	6.22943	1.84232	0.0254615
TC08002631.hg.1	DEFA1B	1667	7.29805	6.44625	1.80475	0.0268235
TC08000910.hg.1	DEFA1B	728358	7.30637	6.44921	1.81147	0.0277063
TC08000095.hg.1	DEFB135	613209	1.8143	2.07566	-1.1986	0.0342833
TC15001571.hg.1	DENND4A	10260	3.84762	3.50138	1.27124	0.00969524
TC03001496.hg.1	DENND6A	201627	3.79345	3.54268	1.18984	0.0190606
TC16000599.hg.1	DHODH	1723	3.93406	3.73703	1.14634	0.0209448
TC04001086.hg.1	DHX15	1665	5.23164	4.85097	1.30195	0.0203521
TC20001212.hg.1	DHX35	60625	3.72218	3.54492	1.13073	0.0446888
TC03001919.hg.1	DHX36	170506	4.02871	3.74118	1.22054	0.0243187
TC17000724.hg.1	DHX40	79665	4.24736	3.98809	1.19688	0.0311437
TC01004881.hg.1	DHX9	1660	4.90901	4.54808	1.28425	0.0100959
TC01001582.hg.1	DHX9	1660	4.61539	4.29642	1.24744	0.0148971
TC05001870.hg.1	DIAPH1	1729	4.21742	4.03351	1.13596	0.0354503
TC13000701.hg.1	DIAPH3	81624	3.6492	3.42206	1.17052	0.0257545
TC13001534.hg.1	DIAPH3	81624	3.85794	3.60743	1.18963	0.0370357
TC0X000779.hg.1	DKC1	1736	4.87103	4.61277	1.19604	0.0225325
TC11001005.hg.1	DLAT	1737	3.92668	3.72071	1.15346	0.0198866
TC07000697.hg.1	DLD	1738	4.7859	4.38689	1.3186	0.00980463
TC14001155.hg.1	DLGAP5	9787	4.61929	4.16597	1.36919	0.0228696
TC14000465.hg.1	DLST	1743	4.16788	3.9264	1.1822	0.0130078
TC14001772.hg.1	DLST	1743	4.12224	3.90323	1.16393	0.0259303
TC09000008.hg.1	DMRT1	1761	4.09761	4.23097	-1.09685	0.0399654
TC01000657.hg.1	DMRTB1	63948	3.8391	4.07107	-1.17444	0.022562
TC07002441.hg.1	DMTF1	9988	4.92688	4.6212	1.23599	0.0497574
TC10002686.hg.1	DNA2	1763	4.24926	3.91723	1.25878	0.0134225
TC10001347.hg.1	DNA2	1763	3.69701	3.47559	1.16588	0.0396034
TC02001323.hg.1	DNAJB2	3300	4.02814	4.14803	-1.08665	0.0426939
TC01000729.hg.1	DNAJC6	645195	3.72754	3.5274	1.14881	0.0316909
TC10002964.hg.1	DNAJC9	23234	4.35472	4.12607	1.17174	0.0413223
TC12000298.hg.1	DNM1L	10059	4.26969	3.98493	1.21821	0.022899
TC10000684.hg.1	DNTT	1791	3.56552	4.00041	-1.35181	0.00924898
TC02000738.hg.1	DPP10	57628	3.21076	2.97659	1.17623	0.0186707
TC07001274.hg.1	DPY19L1	23333	3.83254	3.58085	1.19061	0.0182845
TC17000286.hg.1	---	---	2.34406	2.62354	-1.21375	0.0313484
TC15001394.hg.1	---	---	2.39079	2.75353	-1.28587	0.0154854
TC02000690.hg.1	---	---	4.0465	3.63677	1.32844	0.0290828
TC12000470.hg.1	---	---	4.35176	3.84981	1.41613	0.0432494
TC19001313.hg.1	---	---	2.75103	3.16978	-1.33678	0.0240307
TC10000543.hg.1	---	---	6.33395	7.00467	-1.59186	0.0218774
TC15000489.hg.1	---	---	2.62759	2.86529	-1.17911	0.0498936
TC19000302.hg.1	---	---	4.8069	5.13907	-1.25891	0.0183011
TC17001287.hg.1	---	---	1.60918	2.05349	-1.36067	0.0180563
TC15001529.hg.1	---	---	1.69935	2.0978	-1.31809	0.0430737
TC17001286.hg.1	---	---	1.35911	1.79416	-1.35196	0.00967761
TC22000765.hg.1	---	---	3.04086	3.56708	-1.44014	0.0466759
TC15001395.hg.1	---	---	4.43108	3.94365	1.40194	0.0407731
TC10000518.hg.1	---	---	6.0163	6.53519	-1.43286	0.0190606
TC15001015.hg.1	---	---	5.86174	5.25081	1.52725	0.0406737
TC15001054.hg.1	---	---	5.86174	5.25081	1.52725	0.0406737
TC15001061.hg.1	---	---	5.86174	5.25081	1.52725	0.0406737
TC15001065.hg.1	---	---	5.86174	5.25081	1.52725	0.0406737
TC15001095.hg.1	---	---	5.86174	5.25081	1.52725	0.0406737
TC15001116.hg.1	---	---	5.86174	5.25081	1.52725	0.0406737
TC15001130.hg.1	---	---	5.86174	5.25081	1.52725	0.0406737
TC15001623.hg.1	---	---	5.86174	5.25081	1.52725	0.0406737
TC10000533.hg.1	---	---	5.34006	4.85721	1.3975	0.0208384
TC15000901.hg.1	---	---	1.42514	1.81765	-1.31268	0.0235507
TC17001289.hg.1	---	---	1.59364	1.95339	-1.2832	0.0418894
TC15000544.hg.1	---	---	1.3291	1.62401	-1.22681	0.0110735
TC15000024.hg.1	---	---	5.24377	4.58523	1.57848	0.0414293
TC15000148.hg.1	---	---	5.24377	4.58523	1.57848	0.0414293
TC15000207.hg.1	---	---	5.24377	4.58523	1.57848	0.0414293
TC15000238.hg.1	---	---	5.24377	4.58523	1.57848	0.0414293
TC15000243.hg.1	---	---	5.24377	4.58523	1.57848	0.0414293
TC15001014.hg.1	---	---	5.24377	4.58523	1.57848	0.0414293
TC15001053.hg.1	---	---	5.24377	4.58523	1.57848	0.0414293
TC15001115.hg.1	---	---	5.24377	4.58523	1.57848	0.0414293
TC15001129.hg.1	---	---	5.24377	4.58523	1.57848	0.0414293
TC15001157.hg.1	---	---	5.24377	4.58523	1.57848	0.0414293
TC15001673.hg.1	---	---	5.24377	4.58523	1.57848	0.0414293
TC10000532.hg.1	---	---	2.97629	2.57841	1.31757	0.0177773
TC06000436.hg.1	---	---	1.9199	2.26607	-1.27118	0.00995031
TC05000488.hg.1	---	---	1.82774	2.27215	-1.36075	0.0407432
TC16000973.hg.1	---	---	4.19032	3.62808	1.47656	0.0401129
TC15001424.hg.1	---	---	2.72822	3.16306	-1.35177	0.0191522
TC12000047.hg.1	---	---	4.90536	4.26129	1.56273	0.0359037
TC15000141.hg.1	---	---	5.87336	4.94476	1.90343	0.00959887
TC15000555.hg.1	---	---	1.69421	2.01474	-1.24879	0.0435
TC11001624.hg.1	---	---	3.498	3.86959	-1.29378	0.0320436
TC17001206.hg.1	---	---	2.34406	2.62354	-1.21375	0.0313484
TC17001284.hg.1	---	---	1.43804	1.80177	-1.28675	0.00937089
TC17001280.hg.1	---	---	1.40029	1.69636	-1.2278	0.0320283
TC09001237.hg.1	---	---	1.83585	2.164	-1.2554	0.0473617
TC06000473.hg.1	---	---	1.85237	2.11072	-1.19611	0.0369947
TC06001641.hg.1	---	---	1.87151	2.31141	-1.35651	0.0306457
TC15000498.hg.1	---	---	2.48942	2.69743	-1.15509	0.0436342
TC15000023.hg.1	---	---	5.86174	5.25081	1.52725	0.0406737
TC15000137.hg.1	---	---	5.86174	5.25081	1.52725	0.0406737
TC15000147.hg.1	---	---	5.86174	5.25081	1.52725	0.0406737
TC15000996.hg.1	---	---	5.86174	5.25081	1.52725	0.0406737
TC17001288.hg.1	---	---	1.55293	1.86267	-1.23948	0.0266823
TC11000801.hg.1	---	---	7.77912	6.95587	1.76939	0.0300964
TC19000301.hg.1	---	---	2.52912	2.798	-1.20488	0.04523
TC06001655.hg.1	---	---	4.21644	3.83948	1.29861	0.0162822
TC16000944.hg.1	---	---	7.62292	6.74246	1.84097	0.0107966
TC16001001.hg.1	---	---	7.62292	6.74246	1.84097	0.0107966
TC19001413.hg.1	---	---	4.04126	4.3148	-1.20877	0.0422679
TC15000143.hg.1	---	---	5.36285	4.51219	1.80333	0.0133696
TC06001624.hg.1	---	---	3.55947	3.10132	1.37378	0.0448006
TC15001876.hg.1	---	---	3.3361	2.76929	1.48124	0.0438279
TC11000800.hg.1	---	---	6.29161	5.65376	1.55601	0.0181266
TC07000230.hg.1	---	---	6.22105	5.28417	1.91439	0.0124881
TC15000896.hg.1	---	---	3.3885	2.91778	1.3858	0.0334775
TC15001949.hg.1	---	---	3.94049	3.39839	1.45609	0.0199965
TC15000520.hg.1	---	---	4.27041	4.78133	-1.42496	0.0418285
TC05001631.hg.1	---	---	1.80676	2.33637	-1.44354	0.0356095
TC05001630.hg.1	---	---	1.82774	2.27215	-1.36075	0.0407432
TC22000554.hg.1	---	---	1.89616	2.33657	-1.357	0.0418372
TC15001523.hg.1	---	---	1.61115	1.97021	-1.28259	0.040118
TC16000942.hg.1	---	---	4.83219	4.35554	1.39151	0.0109563
TC06000471.hg.1	---	---	4.22774	3.91271	1.24403	0.0397693
TC15000903.hg.1	---	---	1.61881	1.89167	-1.2082	0.0325043
TC14000530.hg.1	---	---	3.4053	2.97167	1.35063	0.0390768
TC18000351.hg.1	---	---	3.53529	3.0569	1.39319	0.0245749
TC11001590.hg.1	---	---	1.91646	2.20747	-1.22349	0.0307457
TC06000480.hg.1	---	---	2.16072	2.35544	-1.1445	0.0495605
TC05002423.hg.1	---	---	4.40589	3.96519	1.35726	0.0386455
TC11000023.hg.1	DRD4	1815	4.44962	4.69334	-1.18404	0.0188399
TC01001767.hg.1	DTL	51514	4.71246	4.36901	1.26879	0.00972222
TC05001706.hg.1	DTWD2	285605	3.82728	3.50791	1.24778	0.00937436
TC05002066.hg.1	DUSP1	1843	4.14845	4.43358	-1.21852	0.0353805
TC01001413.hg.1	DUSP12	11266	4.22909	3.96366	1.20199	0.0164761
TC17001563.hg.1	DUSP3	1845	4.12952	4.31719	-1.13892	0.0303689
TCUn_gl000228000001.hg.1	DUX4L2	653544	4.55117	4.84641	-1.22709	0.00960807
TCUn_gl000228000002.hg.1	DUX4L2	728410	4.55117	4.84641	-1.22709	0.00960807
TCUn_gl000228000003.hg.1	DUX4L2	728410	4.55117	4.84641	-1.22709	0.00960807
TCUn_gl000228000004.hg.1	DUX4L2	728410	4.55117	4.84641	-1.22709	0.00960807
TCUn_gl000228000005.hg.1	DUX4L2	728410	4.55117	4.84641	-1.22709	0.00960807
TCUn_gl000228000009.hg.1	DUX4L2	728410	4.55117	4.84641	-1.22709	0.00960807
TCUn_gl000228000010.hg.1	DUX4L2	728410	4.55117	4.84641	-1.22709	0.00960807
TCUn_gl000228000006.hg.1	DUX4L2	728410	4.60403	4.95361	-1.27419	0.0175484
TCUn_gl000228000007.hg.1	DUX4L2	728410	4.60403	4.95361	-1.27419	0.0175484
TCUn_gl000228000008.hg.1	DUX4L2	728410	4.60403	4.95361	-1.27419	0.0175484
TC04000942.hg.1	DUX4L2	653545	4.47244	4.76986	-1.22894	0.019123
TC04000945.hg.1	DUX4L2	653548	4.47244	4.76986	-1.22894	0.019123
TC04000941.hg.1	DUX4L2	653544	4.51275	4.79653	-1.21738	0.0197071
TC04000944.hg.1	DUX4L2	441056	4.50875	4.79573	-1.22009	0.0217145
TC10000957.hg.1	DUX4L2	728410	4.59143	4.89507	-1.23426	0.0241021
TC04000946.hg.1	DUX4L2	728410	4.29376	4.526	-1.17465	0.0361528
TC04000943.hg.1	DUX4L4	441056	4.20405	4.55369	-1.27424	0.0126328
TC22000440.hg.1	---	---	3.73751	3.18799	1.46361	0.00964742
TC14000026.hg.1	DUXAP10	503639	3.71986	3.45083	1.205	0.0104778
TC14001573.hg.1	DUXAP10	503639	3.76999	3.41336	1.28043	0.0117143
TC02001022.hg.1	DYNC1I2	1781	4.13134	3.90041	1.17359	0.0260722
TC16001172.hg.1	DYNC1LI2	1783	3.94733	3.77754	1.1249	0.0388508
TC11002850.hg.1	DYNC2H1	79659	3.19166	2.98749	1.15203	0.0476612
TC21000164.hg.1	DYRK1A	1859	4.24251	4.02707	1.16105	0.0427039
TC14001024.hg.1	EAPP	55837	5.14633	4.80314	1.26856	0.0405417
TC08000669.hg.1	EBAG9	9166	4.10316	3.87732	1.16945	0.0407401
TC20000028.hg.1	EBF4	57593	4.65458	4.91224	-1.19554	0.0418878
TC19000083.hg.1	EBI3	10148	4.11854	4.34812	-1.17249	0.0325604
TC10002705.hg.1	ECD	11319	4.42736	4.15292	1.20952	0.0322327
TC14000068.hg.1	EDDM3A	10876	2.24405	2.41651	-1.12698	0.0311142
TC11000870.hg.1	EED	8726	3.75214	3.41015	1.2675	0.0107344
TC05000946.hg.1	EFCAB9	285588	1.82283	2.0607	-1.17925	0.0328152
TC19002616.hg.1	EFNA2	1943	3.51342	3.73503	-1.16604	0.0483997
TC15001736.hg.1	EFTUD1	79631	3.97922	3.7652	1.15991	0.0313725
TC08001044.hg.1	EGR3	1960	4.8086	5.07642	-1.20399	0.0472934
TC07002778.hg.1	EIF2AK1	27102	4.22358	3.89506	1.25573	0.00971601
TC02001739.hg.1	EIF2AK2	5610	4.17861	3.84796	1.25758	0.0168685
TC14000406.hg.1	EIF2S1	1965	4.91066	4.58802	1.25062	0.0207487
TC10001699.hg.1	EIF3A	8661	5.25704	4.91957	1.26354	0.0247428
TC15000340.hg.1	EIF3J	8669	5.26742	4.87949	1.30852	0.0096
TC04001403.hg.1	EIF4E	1977	4.30495	4.08826	1.16207	0.0408495
TC02000603.hg.1	EIF5B	9669	4.56255	4.18425	1.29981	0.0109733
TC05001610.hg.1	ELL2	22936	3.84802	3.57013	1.21242	0.0101211
TC06001813.hg.1	ELOVL5	60481	4.71941	4.4646	1.19317	0.0171501
TC04001467.hg.1	ELOVL6	79071	3.56604	3.33547	1.1733	0.0349238
TC05001393.hg.1	ELOVL7	79993	3.75001	3.60306	1.10722	0.0460627
TC08000216.hg.1	ELP3	55140	4.21963	4.01543	1.15205	0.0181332
TC02000260.hg.1	EML4	27436	3.84563	3.61528	1.17312	0.0128962
TC12000189.hg.1	EMP1	2012	2.9784	3.19297	-1.16036	0.018875
TC01003889.hg.1	ENAH	55740	3.14441	3.00145	1.10416	0.0311246
TC06000984.hg.1	ENPP3	5169	2.93616	2.74196	1.14409	0.0125025
TC11002028.hg.1	---	---	1.66673	1.93383	-1.20339	0.02653
TC13000736.hg.1	---	---	2.44988	2.71585	-1.20244	0.0363241
TC19000401.hg.1	---	---	3.24548	2.92791	1.24623	0.0178496
TC07001801.hg.1	---	---	3.21898	2.7701	1.36498	0.0108243
TC19001100.hg.1	---	---	3.80182	3.32866	1.38815	0.0144921
TC05000268.hg.1	---	---	3.85046	3.43515	1.33359	0.0274143
TC06001967.hg.1	---	---	2.2695	1.98042	1.22186	0.0492021
TC19001852.hg.1	---	---	6.00333	5.45008	1.46739	0.0148412
TC09001584.hg.1	---	---	4.61358	4.04715	1.48085	0.0102336
TC16001306.hg.1	---	---	4.73694	5.11182	-1.29674	0.036657
TC05000827.hg.1	---	---	4.6566	4.13926	1.43132	0.0387038
TC14001351.hg.1	---	---	3.92684	3.5423	1.30545	0.0211546
TC01002830.hg.1	---	---	1.89911	2.12835	-1.17222	0.0490813
TC10000907.hg.1	---	---	4.09396	3.67825	1.33396	0.0352812
TC01000128.hg.1	---	---	7.27265	6.58324	1.61262	0.0189962
TC01003274.hg.1	---	---	3.88658	3.48015	1.32541	0.0485741
TC04000937.hg.1	---	---	3.54973	3.88128	-1.25837	0.0448455
TC07000320.hg.1	---	---	4.97228	4.57326	1.31861	0.0434898
TC17001172.hg.1	---	---	3.89778	3.37399	1.43773	0.0309576
TC07000848.hg.1	---	---	3.96244	3.50228	1.37569	0.0457069
TC0X001126.hg.1	---	---	6.48785	5.85905	1.54627	0.0407504
TC22000594.hg.1	---	---	2.05759	2.29118	-1.17576	0.0435271
TC04000426.hg.1	---	---	1.48179	1.79908	-1.24599	0.0178597
TC01000976.hg.1	---	---	4.31294	3.8681	1.36116	0.0427276
TC12000402.hg.1	---	---	4.26655	3.87978	1.30746	0.041646
TC01000382.hg.1	---	---	4.98646	4.61295	1.2955	0.0184807
TC15001999.hg.1	---	---	2.97059	2.72865	1.18258	0.0399369
TC17000694.hg.1	---	---	4.11086	3.76716	1.26901	0.0456099
TC15001343.hg.1	---	---	4.85105	4.21691	1.55201	0.0113386
TC09001029.hg.1	---	---	4.97306	4.46465	1.42248	0.044061
TC10000610.hg.1	---	---	5.61495	5.09916	1.42977	0.0092968
TC11001126.hg.1	---	---	4.98121	4.62849	1.27696	0.0435196
TC19000162.hg.1	---	---	3.80192	3.52479	1.21178	0.0197181
TC01000528.hg.1	---	---	4.78163	4.33662	1.36133	0.0491561
TC17000881.hg.1	---	---	6.01193	5.44962	1.47663	0.0373302
TC09000563.hg.1	---	---	3.78826	3.35803	1.34746	0.0384451
TC12001658.hg.1	---	---	5.33391	4.99573	1.26416	0.0359175
TC05001929.hg.1	---	---	4.62617	4.93324	-1.23719	0.0409219
TC04001661.hg.1	---	---	3.53309	3.19164	1.26702	0.0369799
TC01002299.hg.1	---	---	4.71157	4.37211	1.26528	0.0418569
TC22000853.hg.1	---	---	3.67736	3.98428	-1.23706	0.0173952
TC20000651.hg.1	---	---	8.66988	8.03282	1.55515	0.0398607
TC04001677.hg.1	---	---	4.97863	4.45716	1.43542	0.0243514
TC15001852.hg.1	---	---	4.1002	3.66244	1.3545	0.00938384
TC06001304.hg.1	---	---	3.55062	3.25977	1.22336	0.0284017
TC08000331.hg.1	---	---	3.30384	3.02827	1.21047	0.0328255
TC04000328.hg.1	---	---	5.92842	5.32821	1.51594	0.0446908
TC01000487.hg.1	---	---	3.63345	3.20511	1.34568	0.0165663
TC17001742.hg.1	---	---	3.91254	3.57826	1.26075	0.0427773
TC07000779.hg.1	---	---	4.68837	4.39007	1.22969	0.0425022
TC02000601.hg.1	---	---	3.77719	3.37944	1.31745	0.0485815
TC07001824.hg.1	---	---	7.27265	6.58324	1.61262	0.0189962
TC05002072.hg.1	---	---	3.94452	3.53628	1.32707	0.0189056
TC12001856.hg.1	---	---	2.76463	2.49572	1.2049	0.015874
TC14000295.hg.1	---	---	3.65931	3.38301	1.21109	0.0379767
TC06000903.hg.1	---	---	3.67747	3.32239	1.27906	0.0400959
TC04001799.hg.1	---	---	3.55148	3.25448	1.22859	0.0427722
TC03001438.hg.1	---	---	3.53802	3.26677	1.20686	0.0474154
TC06002225.hg.1	---	---	4.24741	3.78459	1.37823	0.0109712
TC03000937.hg.1	---	---	2.29287	1.95042	1.26791	0.0258567
TC18000588.hg.1	---	---	1.55702	1.82377	-1.20309	0.0215487
TC01002177.hg.1	---	---	4.02546	4.37323	-1.27259	0.0217547
TC03001734.hg.1	---	---	3.9243	3.60872	1.24452	0.0259006
TC02000759.hg.1	---	---	2.92654	2.45709	1.38459	0.0444727
TC06000143.hg.1	---	---	1.43463	1.68039	-1.18572	0.0405992
TC02001182.hg.1	---	---	6.32489	5.68294	1.56044	0.0135807
TC02000091.hg.1	---	---	1.57353	1.82943	-1.19408	0.0300797
TC14001210.hg.1	---	---	5.99152	5.46788	1.43758	0.0481293
TC17001318.hg.1	---	---	2.55991	2.23553	1.25213	0.0328669
TC15000326.hg.1	---	---	3.93337	3.38474	1.46269	0.0190058
TC18000535.hg.1	---	---	5.21125	4.74697	1.37964	0.0473823
TC01003721.hg.1	---	---	3.62653	3.19196	1.3515	0.0357219
TC12001964.hg.1	---	---	3.32752	2.97978	1.27257	0.0405865
TC13000896.hg.1	---	---	4.47658	4.11572	1.28419	0.0300718
TC04000325.hg.1	---	---	3.79005	3.39565	1.31439	0.0384056
TC04000139.hg.1	---	---	1.3538	1.72936	-1.29734	0.0137801
TC12000715.hg.1	---	---	5.94406	5.43516	1.42297	0.0190483
TC02000324.hg.1	---	---	3.94366	3.63709	1.23677	0.0407618
TC01000461.hg.1	---	---	3.56976	3.15593	1.33222	0.021535
TC06000057.hg.1	---	---	3.91504	3.58381	1.25809	0.0245199
TC10000965.hg.1	---	---	4.50513	4.86842	-1.28636	0.0265568
TC20000783.hg.1	---	---	4.59243	4.10037	1.40644	0.0221375
TC03001083.hg.1	---	---	7.10569	6.39046	1.64175	0.0164982
TC04000560.hg.1	---	---	2.89346	2.6067	1.2199	0.0359412
TC01003628.hg.1	---	---	3.43653	3.04061	1.31578	0.0299055
TC01003342.hg.1	---	---	3.87158	3.56644	1.23554	0.0489472
TC04001128.hg.1	---	---	7.14838	6.44337	1.63015	0.0159949
TC08000782.hg.1	---	---	5.30234	4.81721	1.39971	0.030739
TC06000090.hg.1	---	---	6.83967	6.31246	1.44114	0.018753
TC18000218.hg.1	---	---	6.59125	6.07806	1.42721	0.0334832
TC01001947.hg.1	---	---	3.49674	3.13145	1.28813	0.0299446
TC17000622.hg.1	---	---	6.04505	5.37667	1.58929	0.0271256
TC04000587.hg.1	---	---	4.44657	4.02742	1.33713	0.0103066
TC15000191.hg.1	---	---	3.9566	3.49289	1.37909	0.0407387
TC06001728.hg.1	---	---	4.65917	4.26534	1.31388	0.0273096
TC01001845.hg.1	---	---	2.91801	2.57619	1.26735	0.0279886
TC03000967.hg.1	---	---	7.27265	6.58324	1.61262	0.0189962
TC15001298.hg.1	---	---	3.67195	3.20794	1.37937	0.0429089
TC02002540.hg.1	---	---	7.27265	6.58324	1.61262	0.0189962
TC15001135.hg.1	---	---	7.48627	6.8611	1.5424	0.0298343
TC08000390.hg.1	---	---	7.14838	6.44337	1.63015	0.0159949
TC15001172.hg.1	---	---	4.09492	3.68281	1.33064	0.0129073
TC12000412.hg.1	---	---	4.82238	4.29719	1.43913	0.0373106
TC20000856.hg.1	---	---	3.5575	3.17643	1.3023	0.0360225
TC10000761.hg.1	---	---	5.94507	5.43307	1.42602	0.0476211
TC01003277.hg.1	---	---	5.85633	5.34037	1.42995	0.0359539
TC0X001437.hg.1	---	---	7.27265	6.58324	1.61262	0.0189962
TC01001436.hg.1	---	---	5.03134	5.43766	-1.3253	0.0410998
TC14001252.hg.1	---	---	2.88585	2.45605	1.34704	0.0240201
TC15000235.hg.1	---	---	4.61508	4.21901	1.31592	0.0388691
TC08000753.hg.1	---	---	5.20677	4.63737	1.4839	0.00932407
TC12000319.hg.1	---	---	8.68144	8.05409	1.54472	0.0408664
TC18000518.hg.1	---	---	4.17154	3.83176	1.26556	0.0159823
TC20000971.hg.1	---	---	5.05446	4.78972	1.20142	0.046
TC0X000584.hg.1	---	---	6.78837	6.27687	1.42553	0.0158932
TC15000202.hg.1	---	---	7.48627	6.8611	1.5424	0.0298343
TC05000124.hg.1	---	---	3.00472	2.74328	1.19868	0.0385724
TC03001132.hg.1	---	---	3.9384	3.41439	1.43795	0.0143026
TC19001504.hg.1	---	---	3.17425	2.88211	1.22445	0.0405506
TC04001562.hg.1	---	---	7.27062	6.59271	1.59982	0.00954146
TC08000693.hg.1	---	---	7.14838	6.44337	1.63015	0.0159949
TC07001820.hg.1	---	---	3.37909	3.03417	1.27008	0.0236716
TC07000389.hg.1	---	---	4.13199	3.81363	1.24691	0.0425022
TC0X001016.hg.1	---	---	7.11346	6.42157	1.6154	0.017676
TC03002143.hg.1	---	---	3.33359	2.90559	1.34536	0.0176744
TC12001568.hg.1	---	---	2.93681	2.63008	1.2369	0.0335641
TC17000040.hg.1	---	---	4.05923	3.62814	1.34825	0.0304775
TC15000187.hg.1	---	---	4.78787	4.20036	1.50265	0.00995946
TC15000161.hg.1	---	---	3.59636	3.19809	1.31793	0.0207839
TC04001144.hg.1	---	---	3.46571	3.12831	1.26348	0.0292364
TC12001398.hg.1	---	---	2.64018	2.23931	1.3203	0.0466696
TC0X001193.hg.1	---	---	3.46299	3.76963	-1.23682	0.0272545
TC12000140.hg.1	---	---	3.59518	3.83565	-1.18138	0.0418338
TC14000125.hg.1	---	---	1.74939	2.04897	-1.23079	0.0333219
TC02001043.hg.1	---	---	1.56022	1.81244	-1.19104	0.0238416
TC02000330.hg.1	---	---	1.42946	1.76928	-1.2656	0.0213639
TC02002409.hg.1	---	---	3.72485	3.49368	1.17379	0.0326237
TC02001184.hg.1	---	---	1.37179	1.59446	-1.16689	0.0240383
TC02000434.hg.1	---	---	2.01174	1.67723	1.26095	0.0333285
TC12000146.hg.1	---	---	3.01592	2.68152	1.26085	0.024512
TC12001192.hg.1	---	---	3.55679	3.11147	1.36162	0.00916393
TC07001554.hg.1	---	---	1.6541	1.90177	-1.18729	0.0269604
TC12001358.hg.1	---	---	3.54149	3.19138	1.27466	0.0258509
TC01000483.hg.1	---	---	3.07954	2.83006	1.18878	0.0486042
TC13000590.hg.1	---	---	1.71576	1.94708	-1.17391	0.0473239
TC0X000869.hg.1	---	---	1.54548	1.76072	-1.1609	0.0322412
TC01000415.hg.1	---	---	3.30646	2.94511	1.28463	0.0188583
TC21000952.hg.1	---	---	4.37338	4.07089	1.23328	0.0193953
TC21000430.hg.1	---	---	3.91498	3.5993	1.2446	0.0317978
TC10001696.hg.1	---	---	7.13737	6.63567	1.41588	0.0141597
TC03000437.hg.1	---	---	9.23439	8.62786	1.52259	0.0431518
TC02000885.hg.1	---	---	3.82341	4.00675	-1.13551	0.01809
TC15002119.hg.1	---	---	3.85815	3.63792	1.16492	0.0219121
TC13000067.hg.1	---	---	1.80843	2.05687	-1.18793	0.0343475
TC08001306.hg.1	---	---	6.14267	6.60766	-1.38031	0.0123296
TC13000136.hg.1	---	---	2.97339	2.63524	1.26414	0.0487255
TC0X001234.hg.1	---	---	1.40741	1.69536	-1.2209	0.0348589
TC08001160.hg.1	---	---	1.53275	1.758	-1.16898	0.0231539
TC06000025.hg.1	---	---	4.42069	4.06334	1.28107	0.00978246
TC10001401.hg.1	---	---	4.34734	3.99379	1.2777	0.0217
TC08000558.hg.1	---	---	1.28054	1.55343	-1.20823	0.0328874
TC16000588.hg.1	---	---	1.75713	2.24419	-1.40159	0.0159923
TC06000026.hg.1	---	---	4.36825	4.08267	1.2189	0.0474377
TC20000179.hg.1	---	---	1.36915	1.59757	-1.17156	0.0407417
TC10000800.hg.1	---	---	1.53045	1.77952	-1.18845	0.0337973
TC03001577.hg.1	---	---	1.4899	1.77028	-1.21452	0.0337111
TC12000011.hg.1	---	---	3.83459	3.41487	1.33766	0.0471667
TC19001073.hg.1	---	---	1.34069	1.63508	-1.22637	0.0316951
TC02002029.hg.1	---	---	1.28816	1.53286	-1.18484	0.0259861
TC12002121.hg.1	---	---	1.61519	1.82038	-1.15284	0.0426477
TC03001697.hg.1	---	---	5.01193	4.59607	1.3341	0.0413862
TC08001324.hg.1	---	---	2.42756	2.65952	-1.17442	0.0399538
TC14000880.hg.1	---	---	7.3318	6.3394	1.98949	0.00955319
TC08001633.hg.1	---	---	3.77869	3.54216	1.17816	0.0486255
TC0X001102.hg.1	---	---	1.23542	1.55322	-1.24643	0.0176013
TC10001679.hg.1	---	---	3.68211	3.94206	-1.19743	0.010975
TC22000211.hg.1	---	---	3.44988	3.16395	1.21919	0.0418512
TC05001833.hg.1	---	---	3.40965	2.99336	1.33449	0.0098
TC05001328.hg.1	---	---	1.71547	2.00763	-1.22448	0.0186979
TC12001394.hg.1	---	---	1.72142	1.98912	-1.20389	0.0269371
TC18000050.hg.1	---	---	5.72176	5.29999	1.33957	0.0193904
TC08000460.hg.1	---	---	2.19917	2.46685	-1.20387	0.019596
TC13000609.hg.1	---	---	1.6477	1.86584	-1.16323	0.0436654
TC19001828.hg.1	---	---	4.93107	4.53177	1.31886	0.049555
TC10000495.hg.1	---	---	1.95944	2.26505	-1.23594	0.00977622
TC20000948.hg.1	---	---	2.06298	2.30754	-1.18473	0.0319104
TC02002737.hg.1	---	---	2.91158	2.57663	1.26134	0.0355263
TC06001053.hg.1	---	---	3.5159	3.24622	1.20554	0.0345894
TC01003597.hg.1	---	---	2.91392	3.13332	-1.16425	0.0447069
TC01001309.hg.1	---	---	2.34252	2.5438	-1.14972	0.0339143
TC11001305.hg.1	---	---	3.81914	4.06037	-1.182	0.0493821
TC21000300.hg.1	---	---	2.22155	2.45246	-1.17357	0.0374506
TC07000094.hg.1	---	---	1.93428	2.10558	-1.12607	0.0408774
TC06001143.hg.1	---	---	1.70117	1.92112	-1.16469	0.0413169
TC20000895.hg.1	---	---	3.99497	4.15575	-1.11789	0.0415926
TC03001107.hg.1	---	---	3.8452	4.11821	-1.20832	0.0160155
TC09000632.hg.1	---	---	3.51806	3.78895	-1.20656	0.00972892
TC05001523.hg.1	---	---	5.10551	5.34997	-1.18465	0.0325557
TC01000014.hg.1	---	---	5.12497	4.58259	1.45637	0.0487225
TC03000224.hg.1	---	---	4.12079	4.35536	-1.17656	0.0207922
TC04000880.hg.1	---	---	4.39952	3.93621	1.3787	0.017729
TC18000116.hg.1	---	---	1.8392	2.07864	-1.18053	0.0481282
TC13000186.hg.1	---	---	5.91162	6.16227	-1.18974	0.0431784
TC12002072.hg.1	---	---	4.92236	5.15619	-1.17596	0.0272562
TC13000664.hg.1	---	---	3.38736	2.97691	1.32909	0.0180694
TC07000418.hg.1	---	---	5.94009	6.35379	-1.33209	0.0247623
TC01003037.hg.1	---	---	2.31628	2.50503	-1.13978	0.0236429
TC10000194.hg.1	---	---	2.05111	2.27647	-1.16906	0.0428019
TC0X001041.hg.1	---	---	3.22725	3.47627	-1.1884	0.0320251
TC09000624.hg.1	---	---	4.16499	3.65473	1.42431	0.0127071
TC09001069.hg.1	---	---	1.74939	1.9663	-1.16224	0.0416278
TC10000201.hg.1	---	---	1.93689	2.20864	-1.20726	0.0432454
TC09000698.hg.1	---	---	5.42478	5.67688	-1.19094	0.0403299
TC10001431.hg.1	---	---	4.10326	4.54603	-1.35921	0.0106989
TC01000485.hg.1	---	---	4.63073	4.82016	-1.14031	0.0258484
TC10001509.hg.1	---	---	2.35613	2.57495	-1.16378	0.0426393
TC02002147.hg.1	---	---	2.28011	2.52904	-1.18833	0.0285417
TC09001635.hg.1	---	---	4.41828	4.7262	-1.23793	0.0126086
TC14000806.hg.1	---	---	3.82025	4.08826	-1.20415	0.0130156
TC07001051.hg.1	---	---	3.60013	3.83145	-1.17391	0.0396578
TC01001224.hg.1	---	---	1.75871	2.03119	-1.20788	0.0192518
TC13000369.hg.1	---	---	2.79007	2.43767	1.27668	0.0376297
TC09000023.hg.1	---	---	3.39421	3.13048	1.20057	0.0460766
TC06001095.hg.1	---	---	2.52253	2.26246	1.19754	0.0182971
TC17001780.hg.1	---	---	3.01077	2.74966	1.1984	0.0407123
TC02000108.hg.1	---	---	3.08332	2.74998	1.25993	0.0487725
TC02002210.hg.1	---	---	4.03997	3.7385	1.2324	0.0267318
TC05000627.hg.1	---	---	4.69546	4.95367	-1.19599	0.0418511
TC17002920.hg.1	---	---	4.31457	4.53974	-1.16891	0.0395777
TC0X001060.hg.1	---	---	2.68113	2.93178	-1.18974	0.0287001
TC13000348.hg.1	---	---	4.39791	4.85009	-1.3681	0.02047
TC13000637.hg.1	---	---	5.48089	5.72338	-1.18303	0.0295069
TC03001142.hg.1	---	---	3.50505	3.1924	1.24198	0.0490438
TC10001642.hg.1	---	---	2.32955	2.54324	-1.15965	0.042706
TC01003776.hg.1	---	---	1.77298	2.00591	-1.17522	0.0439519
TC01001631.hg.1	---	---	5.56965	5.84365	-1.20916	0.0376128
TC01005628.hg.1	---	---	3.28199	3.44613	-1.12049	0.038424
TC01002571.hg.1	---	---	3.47001	3.69966	-1.17255	0.0268873
TC01000834.hg.1	---	---	2.98058	3.32701	-1.2714	0.0295006
TC01001697.hg.1	---	---	4.07236	4.27167	-1.14814	0.0191462
TC09001137.hg.1	---	---	3.6438	3.16172	1.39675	0.040134
TC03003378.hg.1	---	---	4.29738	4.45787	-1.11766	0.0438938
TC02000958.hg.1	---	---	1.49954	1.77111	-1.20712	0.0186061
TC01000306.hg.1	---	---	4.22011	4.49879	-1.21309	0.0207605
TC01003774.hg.1	---	---	2.95377	2.67966	1.20925	0.0186734
TC01000234.hg.1	---	---	5.2078	4.85522	1.27685	0.0292776
TC05001051.hg.1	---	---	4.42468	4.1823	1.18295	0.0369512
TC01002663.hg.1	---	---	4.29366	3.8216	1.38709	0.00957303
TC08001326.hg.1	---	---	1.98938	2.2255	-1.17783	0.0405646
TC20000707.hg.1	---	---	3.50883	3.71342	-1.15235	0.0188242
TC22000708.hg.1	---	---	3.7965	4.02761	-1.17374	0.0319924
TC13000117.hg.1	---	---	3.579	3.83514	-1.19427	0.0421326
TC09000930.hg.1	---	---	2.05617	2.28335	-1.17055	0.0432447
TC06001013.hg.1	---	---	2.59033	2.28738	1.23367	0.0235433
TC10001076.hg.1	---	---	4.40275	3.90423	1.41276	0.0113026
TC0X000145.hg.1	---	---	4.94958	4.35076	1.51448	0.0126
TC01002111.hg.1	---	---	3.87077	4.08227	-1.15789	0.0215864
TC09000014.hg.1	---	---	1.79032	2.07129	-1.21501	0.0334589
TC02002423.hg.1	---	---	6.57656	6.98916	-1.33109	0.0296566
TC09000770.hg.1	---	---	4.19886	3.90048	1.22976	0.0331877
TC09000383.hg.1	---	---	4.58347	4.22167	1.28502	0.0259972
TC10001118.hg.1	---	---	1.56624	1.81287	-1.18643	0.0170915
TC0X001351.hg.1	---	---	1.79346	2.0769	-1.2171	0.00955303
TC09000557.hg.1	---	---	1.41531	1.68931	-1.20916	0.0258405
TC03000120.hg.1	---	---	6.85864	6.33537	1.4372	0.027124
TC06001758.hg.1	---	---	3.46825	3.69312	-1.16867	0.0282026
TC21000318.hg.1	---	---	3.11184	2.77089	1.26659	0.0484558
TC20000680.hg.1	---	---	6.21795	5.84484	1.29514	0.04011
TC10002247.hg.1	---	---	3.2917	3.44287	-1.11047	0.0257389
TC02000699.hg.1	---	---	3.3945	3.09594	1.22991	0.0129906
TC01000008.hg.1	---	---	5.39056	4.82995	1.47489	0.045482
TC02001724.hg.1	---	---	3.66877	3.16579	1.41714	0.0130947
TC08001583.hg.1	---	---	3.70019	3.16286	1.45128	0.0098156
TC01001321.hg.1	---	---	2.79637	2.56698	1.17234	0.0490685
TC0X000083.hg.1	---	---	4.23985	3.76256	1.39213	0.0446898
TC20000376.hg.1	---	---	2.65919	2.30049	1.28227	0.0126328
TC12001421.hg.1	---	---	8.14032	7.58072	1.47386	0.0321684
TC10001197.hg.1	---	---	4.75383	4.18631	1.48197	0.038732
TC20000914.hg.1	---	---	2.58633	2.31378	1.20794	0.0306523
TC15001485.hg.1	---	---	4.94701	4.24223	1.6299	0.0301765
TC06001431.hg.1	---	---	4.0801	3.53558	1.45853	0.0401094
TC21000045.hg.1	---	---	3.20033	2.89207	1.23821	0.0186707
TC18000183.hg.1	---	---	2.06987	2.3299	-1.1975	0.0316563
TC05001474.hg.1	---	---	1.84348	2.08156	-1.17942	0.0285357
TC14001533.hg.1	---	---	3.98009	3.42694	1.46729	0.0252943
TC09001364.hg.1	---	---	5.37552	4.79052	1.50003	0.031391
TC04000321.hg.1	---	---	5.72966	4.97086	1.69208	0.010053
TC18000155.hg.1	---	---	1.5717	1.91145	-1.26554	0.0179114
TC07001760.hg.1	---	---	4.41061	3.86927	1.45532	0.0339143
TC18000012.hg.1	---	---	3.9146	3.50243	1.33068	0.0432382
TC03000270.hg.1	---	---	2.55185	2.21136	1.26619	0.0463894
TC05001709.hg.1	---	---	4.87274	4.29522	1.49229	0.0401297
TC06001677.hg.1	---	---	4.91538	4.49178	1.34127	0.0267971
TC15001138.hg.1	---	---	4.78787	4.20036	1.50265	0.00995946
TC15001572.hg.1	---	---	5.31817	4.62145	1.62081	0.0104861
TC16001232.hg.1	---	---	4.99255	4.46139	1.44509	0.0313895
TC01001816.hg.1	---	---	3.60455	3.19469	1.32856	0.0485405
TC02000042.hg.1	---	---	4.7059	4.03097	1.59652	0.0110794
TC03000836.hg.1	---	---	4.00428	3.54705	1.37291	0.00950382
TC03001541.hg.1	---	---	1.97595	2.22886	-1.19161	0.037987
TC03000464.hg.1	---	---	3.77119	3.39308	1.29964	0.00915702
TC03000726.hg.1	---	---	5.06933	5.40219	-1.25952	0.00966438
TC07002017.hg.1	---	---	3.09028	3.38816	-1.22934	0.0304708
TC03000596.hg.1	---	---	3.59649	3.82198	-1.16918	0.0388611
TC07001742.hg.1	---	---	3.61314	3.29956	1.24279	0.0180545
TC07002019.hg.1	---	---	5.19098	5.46702	-1.21087	0.0197048
TC11001583.hg.1	---	---	3.88986	4.10959	-1.16452	0.0322156
TC16000311.hg.1	---	---	6.40477	6.82834	-1.34124	0.0109172
TC16001473.hg.1	---	---	5.12917	5.57101	-1.35834	0.0448529
TC15000271.hg.1	---	---	2.80617	3.0196	-1.15944	0.0450612
TC11003355.hg.1	---	---	2.81754	2.96559	-1.10807	0.0416094
TC19001982.hg.1	---	---	3.09675	3.32465	-1.17113	0.0337481
TC17001155.hg.1	---	---	2.60362	2.86781	-1.20096	0.0277395
TC06002409.hg.1	---	---	4.95257	5.39408	-1.35802	0.031399
TC06000013.hg.1	---	---	4.99532	5.40994	-1.33295	0.0435441
TC01001032.hg.1	---	---	3.26764	2.9156	1.27636	0.00924887
TC12001383.hg.1	---	---	2.6496	2.41656	1.17531	0.0492344
TC02000534.hg.1	---	---	3.48645	3.13675	1.27429	0.0143951
TC01004707.hg.1	---	---	4.20778	3.88729	1.24875	0.0193218
TC12002715.hg.1	---	---	2.98707	3.30641	-1.24775	0.00916872
TC05000292.hg.1	---	---	1.85861	2.11662	-1.19583	0.0318643
TC04001442.hg.1	---	---	2.96314	2.63372	1.25651	0.0210246
TC04001629.hg.1	---	---	1.82566	2.01828	-1.14283	0.0483867
TC04002466.hg.1	---	---	2.68157	2.86393	-1.13474	0.0359183
TC05002098.hg.1	---	---	2.0395	2.28257	-1.18351	0.0124029
TC04001601.hg.1	---	---	2.95642	3.18338	-1.17036	0.0416039
TC18000200.hg.1	---	---	3.35936	3.59024	-1.17355	0.0464006
TC05001468.hg.1	---	---	2.23974	2.47518	-1.17726	0.0190859
TC04000786.hg.1	---	---	2.13487	2.40391	-1.20501	0.047451
TC05000553.hg.1	---	---	2.18091	2.41369	-1.1751	0.0475339
TC05003444.hg.1	---	---	4.61878	4.18441	1.35132	0.0294298
TC09002349.hg.1	---	---	5.37958	5.71215	-1.25926	0.0430714
TC09000807.hg.1	---	---	5.35916	5.67151	-1.24172	0.0447637
TC19001260.hg.1	---	---	3.81667	3.47808	1.26452	0.0290227
TC04000790.hg.1	---	---	1.81501	2.0696	-1.193	0.0170546
TC04001603.hg.1	---	---	4.49456	4.12204	1.29461	0.0159799
TC04000707.hg.1	---	---	3.04038	2.73165	1.23862	0.0264878
TC05000539.hg.1	---	---	2.85157	3.03788	-1.13785	0.0490069
TC05000527.hg.1	---	---	1.493	1.71956	-1.17005	0.0407325
TC05001564.hg.1	---	---	1.54058	1.80047	-1.19739	0.0166363
TC17000789.hg.1	---	---	3.7292	4.01088	-1.21561	0.0388665
TC17000869.hg.1	---	---	1.67212	1.93756	-1.202	0.0401124
TC03001872.hg.1	---	---	1.7885	2.19363	-1.32421	0.0104361
TC0X000758.hg.1	---	---	1.76955	2.12066	-1.27554	0.0173349
TC09001530.hg.1	---	---	1.8952	2.1624	-1.20347	0.0453077
TC05000167.hg.1	---	---	4.49051	3.88777	1.5186	0.0095977
TC11001451.hg.1	---	---	6.79015	6.17848	1.52803	0.0224344
TC18000460.hg.1	---	---	1.58565	1.94395	-1.28192	0.0174118
TC15001300.hg.1	---	---	4.07915	3.48958	1.5048	0.0163313
TC11002367.hg.1	---	---	5.0659	5.34236	-1.21122	0.0409071
TC08001649.hg.1	---	---	1.39249	1.68403	-1.22395	0.0422024
TC03001091.hg.1	---	---	2.85114	2.41911	1.34912	0.00954696
TC01000228.hg.1	---	---	1.59614	1.78674	-1.14123	0.0322415
TC09000377.hg.1	---	---	2.88945	2.46484	1.34221	0.0400805
TC17000142.hg.1	---	---	4.07431	3.46375	1.52685	0.0123834
TC15001681.hg.1	---	---	1.55629	1.86939	-1.24238	0.0255793
TC05001229.hg.1	---	---	6.99357	6.53387	1.37526	0.0464563
TC01002756.hg.1	---	---	3.83062	3.39084	1.3564	0.016
TC01002466.hg.1	---	---	4.13042	4.42092	-1.22306	0.0382348
TC15000348.hg.1	---	---	6.25652	5.66914	1.50251	0.0382208
TC01001902.hg.1	---	---	3.06919	2.74411	1.25274	0.0328507
TC20000435.hg.1	---	---	1.61284	1.86744	-1.193	0.0190196
TC11001408.hg.1	---	---	3.30909	2.94608	1.2861	0.0295395
TC18000027.hg.1	---	---	1.40816	1.74577	-1.26366	0.0440647
TC01000295.hg.1	---	---	4.29209	4.59541	-1.23398	0.039904
TC08000340.hg.1	---	---	2.76845	2.4507	1.24639	0.0273351
TC15000190.hg.1	---	---	4.8685	4.43602	1.34955	0.0474337
TC16000410.hg.1	---	---	5.23596	5.61324	-1.29889	0.0307265
TC0Y000103.hg.1	---	---	3.71002	3.33858	1.29364	0.0126332
TC01001952.hg.1	---	---	1.69529	1.92793	-1.17498	0.0462941
TC20000413.hg.1	---	---	3.68227	3.29092	1.31162	0.0252126
TC0Y000200.hg.1	---	---	3.71002	3.33858	1.29364	0.0126332
TC03000697.hg.1	---	---	2.00325	2.26638	-1.20008	0.038119
TC01002392.hg.1	---	---	6.37122	5.72554	1.56447	0.0295039
TC04001207.hg.1	---	---	1.86603	2.1266	-1.19795	0.0473873
TC01001268.hg.1	---	---	5.64472	5.06338	1.49624	0.0367889
TC01000114.hg.1	---	---	1.46632	1.70443	-1.17945	0.0191855
TC07001876.hg.1	---	---	1.52611	1.79826	-1.20761	0.0313016
TC12000646.hg.1	---	---	1.74789	2.00766	-1.19729	0.0211307
TC01001646.hg.1	---	---	2.35176	2.61497	-1.20015	0.0259816
TC03001781.hg.1	---	---	4.12629	3.74523	1.30231	0.0321735
TC02000492.hg.1	---	---	3.57369	3.17548	1.31787	0.0188416
TC04001743.hg.1	---	---	2.82248	3.10567	-1.21688	0.0270804
TC06001494.hg.1	---	---	1.40517	1.66256	-1.19531	0.0317652
TC11001751.hg.1	---	---	2.70141	2.28892	1.33098	0.0282698
TC03000646.hg.1	---	---	3.59663	3.1783	1.33638	0.017656
TC10000027.hg.1	---	---	1.41996	1.72884	-1.23875	0.0132601
TC16000778.hg.1	---	---	1.41991	1.69836	-1.21289	0.0438288
TC06000095.hg.1	---	---	4.09995	3.67697	1.3407	0.0426853
TC15001481.hg.1	---	---	1.877	2.11383	-1.1784	0.0414397
TC10000656.hg.1	---	---	2.27137	2.54753	-1.21097	0.0407673
TC14000216.hg.1	---	---	3.8373	4.12874	-1.22386	0.00967568
TC03001141.hg.1	---	---	3.44328	3.71001	-1.20308	0.0328053
TC08001692.hg.1	---	---	4.2217	3.94117	1.21464	0.0253925
TC08000889.hg.1	---	---	4.61941	4.85637	-1.1785	0.048579
TC08000272.hg.1	---	---	2.47929	2.69676	-1.16269	0.0210734
TC08000942.hg.1	---	---	4.20953	4.39601	-1.13799	0.0396613
TC08001707.hg.1	---	---	4.75481	5.03485	-1.21423	0.0267443
TC05000879.hg.1	---	---	3.01962	3.22477	-1.15281	0.039361
TC08000306.hg.1	---	---	1.36551	1.70417	-1.26458	0.00966667
TC08001277.hg.1	---	---	3.9713	3.68683	1.21796	0.0159975
TC09000120.hg.1	---	---	3.28912	2.81953	1.38472	0.0159437
TC08001169.hg.1	---	---	3.69029	3.4416	1.18813	0.0334995
TC08001488.hg.1	---	---	3.98065	4.2082	-1.17084	0.0418653
TC11002121.hg.1	---	---	3.69927	3.85308	-1.1125	0.0433914
TC11000423.hg.1	---	---	5.68649	5.94672	-1.19767	0.0276503
TC11000851.hg.1	---	---	1.64105	1.94242	-1.23231	0.0245742
TC11000192.hg.1	---	---	5.19273	4.86443	1.25553	0.0247543
TC11002217.hg.1	---	---	1.54919	1.8156	-1.20281	0.0317125
TC11000949.hg.1	---	---	1.81332	2.06234	-1.1884	0.0159949
TC08000976.hg.1	---	---	2.84444	3.05713	-1.15885	0.0397566
TC08000837.hg.1	---	---	3.90021	4.14861	-1.18789	0.0117427
TC11002043.hg.1	---	---	5.07039	4.66651	1.32306	0.0407442
TC11001956.hg.1	---	---	4.40512	4.70702	-1.23277	0.016
TC11000336.hg.1	---	---	2.64185	2.89446	-1.19136	0.0285299
TC12001055.hg.1	---	---	4.26382	4.44771	-1.13595	0.0498995
TC12001344.hg.1	---	---	2.88082	2.63644	1.18458	0.0432454
TC11002309.hg.1	---	---	3.38643	3.60849	-1.1664	0.0250007
TC11000762.hg.1	---	---	3.74753	3.97097	-1.16751	0.0176319
TC12001725.hg.1	---	---	2.84501	3.04996	-1.15265	0.0484413
TC12000916.hg.1	---	---	3.72498	3.92553	-1.14914	0.0465195
TC12001103.hg.1	---	---	5.38116	4.94468	1.3533	0.0124555
TC12000364.hg.1	---	---	3.92171	4.0906	-1.12419	0.0287553
TC10000852.hg.1	---	---	3.96435	3.65719	1.23727	0.0259304
TC14001574.hg.1	---	---	3.80927	3.31142	1.41211	0.00990909
TC12000632.hg.1	---	---	2.1789	2.40984	-1.1736	0.0221859
TC12001592.hg.1	---	---	2.06555	2.33625	-1.20639	0.0227656
TC12001918.hg.1	---	---	4.27001	4.48485	-1.16057	0.039165
TC12001704.hg.1	---	---	4.02471	3.5793	1.3617	0.00937089
TC14000601.hg.1	---	---	3.98785	4.22924	-1.18212	0.022524
TC12000957.hg.1	---	---	3.02532	3.272	-1.18647	0.0445244
TC14001522.hg.1	---	---	2.90909	3.13308	-1.16796	0.0483867
TC15001616.hg.1	---	---	1.56532	1.78904	-1.16775	0.0251968
TC15000341.hg.1	---	---	3.47299	3.07109	1.32125	0.0145592
TC17000738.hg.1	---	---	5.12695	5.40922	-1.21611	0.00991899
TC18000289.hg.1	---	---	3.40932	3.63478	-1.16915	0.0256246
TC15001539.hg.1	---	---	3.73418	3.36063	1.29553	0.0169063
TC15000234.hg.1	---	---	4.0394	3.6859	1.27766	0.0161544
TC15001050.hg.1	---	---	3.40182	2.9708	1.34819	0.00959104
TC15000255.hg.1	---	---	5.08356	5.51335	-1.34703	0.0101211
TC15000359.hg.1	---	---	1.47946	1.6873	-1.15495	0.0407922
TC15001831.hg.1	---	---	6.52205	6.87279	-1.27521	0.0287837
TC20000814.hg.1	---	---	4.59171	4.82863	-1.17847	0.0317138
TC01000394.hg.1	EPB41	2035	4.33751	4.13681	1.14926	0.0366561
TC06002106.hg.1	EPB41L2	2037	3.75928	3.58855	1.12563	0.0483036
TC02000758.hg.1	EPB41L5	57669	3.21829	3.0628	1.11379	0.0320294
TC02000293.hg.1	EPCAM	4072	4.01906	3.77473	1.18455	0.0109202
TC01003833.hg.1	EPRS	2058	4.47271	4.19467	1.21254	0.0294229
TC01002649.hg.1	EPS15	2060	4.81398	4.41946	1.3145	0.00995122
TC13000612.hg.1	EPSTI1	94240	4.39686	4.12287	1.20915	0.0176828
TC02000150.hg.1	EPT1	85465	3.89949	3.6484	1.19011	0.0287765
TC16002040.hg.1	ERI2	112479	3.94134	3.64042	1.23193	0.0198866
TC14001141.hg.1	ERO1A	30001	4.01498	3.75551	1.19704	0.0264597
TC18000401.hg.1	ESCO1	114799	3.76936	3.50602	1.20025	0.0313382
TC20000637.hg.1	ESF1	51575	4.50198	4.08782	1.33252	0.00947619
TC05001831.hg.1	ETF1	2107	4.60574	4.38301	1.16694	0.047468
TC12000239.hg.1	ETNK1	55500	4.12737	3.81016	1.24592	0.0211744
TC01002868.hg.1	EVI5	7813	3.12531	2.91793	1.15459	0.0251892
TC07003386.hg.1	EVX1	2128	3.43522	3.62146	-1.1378	0.0395617
TC02002550.hg.1	EVX2	344191	3.58086	3.84378	-1.19991	0.0145824
TC22000195.hg.1	EWSR1	2130	4.92422	4.66089	1.20025	0.0341733
TC14001170.hg.1	EXOC5	10640	4.12926	3.84983	1.21371	0.0307483
TC10000661.hg.1	EXOC6	54536	4.14751	3.88067	1.20317	0.0351091
TC20000368.hg.1	EYA2	2139	3.37963	3.49871	-1.08604	0.0400934
TC02004392.hg.1	FABP1	2168	2.2496	2.46871	-1.16401	0.0159182
TC08001366.hg.1	FABP12	646486	1.57855	1.74514	-1.1224	0.0446863
TC01002644.hg.1	FAF1	11124	3.76002	3.5746	1.13715	0.0384758
TC15000794.hg.1	FAM103A1	83640	5.0573	4.62224	1.35197	0.0148974
TC05001966.hg.1	FAM114A2	10827	3.69639	3.51857	1.13117	0.00963946
TC0X001396.hg.1	FAM122B	159090	3.91147	3.65723	1.19271	0.0211266
TC0X001399.hg.1	FAM127C	441518	3.97654	4.23243	-1.19407	0.0117418
TC07001602.hg.1	FAM133B	257415	4.15581	3.92573	1.1729	0.0241052
TC07003060.hg.1	FAM133DP	728066	5.14493	4.62705	1.43185	0.0193571
TC10000908.hg.1	FAM175B	23172	4.46712	4.22841	1.17993	0.0449948
TC20000173.hg.1	FAM182B	728882	2.51915	2.73429	-1.16081	0.0401122
TC07002901.hg.1	FAM183BP	340286	3.16934	3.41243	-1.18352	0.0191252
TC10001065.hg.1	FAM188A	80013	3.97243	3.60802	1.28736	0.0102336
TC10000310.hg.1	FAM21A	387680	4.68497	4.47775	1.15446	0.046369
TC10000294.hg.1	FAM21C	253725	4.72063	4.49486	1.1694	0.0261069
TC10000298.hg.1	FAM35BP	439965	3.67421	3.33283	1.26696	0.0122115
TC10000306.hg.1	FAM35DP	439965	3.63071	3.28666	1.26932	0.00960269
TC0X000624.hg.1	FAM45A	404636	4.51194	4.16486	1.27198	0.0198041
TC10000863.hg.1	FAM45A	404636	4.49192	4.24573	1.18607	0.0339132
TC10002322.hg.1	FAM45B	55855	4.87476	4.45967	1.33338	0.00934884
TC0X000430.hg.1	FAM46D	169966	1.52456	1.71395	-1.14028	0.0215762
TC01001717.hg.1	FAM72A	729533	3.97147	3.806	1.12153	0.0484426
TC01001045.hg.1	FAM72B	653820	3.91055	3.65248	1.19588	0.00967442
TC01003174.hg.1	FAM72C	554282	4.07918	3.73217	1.27192	0.0188655
TC01003085.hg.1	FAM72D	728833	3.90229	3.45522	1.36327	0.00985806
TC11002208.hg.1	FAM76B	143684	4.18846	3.95	1.17973	0.0265253
TC06000115.hg.1	FAM8A1	51439	4.09256	3.88639	1.15362	0.0189476
TC12001175.hg.1	FAM90A1	55138	3.20995	3.39677	-1.13825	0.0193648
TC08002632.hg.1	FAM90A7P	441317	3.66035	3.86284	-1.15068	0.0324758
TC08002634.hg.1	FAM90A7P	441317	3.70462	3.93747	-1.17515	0.0371339
TC02001729.hg.1	FAM98A	25940	3.46163	3.24333	1.16337	0.0202593
TC03000051.hg.1	FANCD2	2177	4.14578	3.87479	1.20663	0.0148056
TC11000208.hg.1	FAR1	84188	4.19702	3.93112	1.20238	0.0430799
TC02002813.hg.1	FARSB	10056	4.66317	4.39075	1.20783	0.0160773
TC02002510.hg.1	FASTKD1	79675	3.90494	3.58196	1.25091	0.0126307
TC02001221.hg.1	FASTKD2	22868	3.39969	3.11902	1.21475	0.0440183
TC15002630.hg.1	FBXO22-AS1	692224	4.60928	4.27529	1.2605	0.0265244
TC22000245.hg.1	FBXO7	25793	4.66857	4.27979	1.30929	0.020037
TC06000660.hg.1	FBXO9	26268	3.91367	3.62933	1.21786	0.0137753
TC01001351.hg.1	FCER1A	2205	4.80626	4.25453	1.46584	0.0154595
TC14000462.hg.1	FCF1	51077	4.42253	4.18942	1.17537	0.041092
TC10000665.hg.1	FFAR4	338557	3.02504	3.21261	-1.13884	0.0245749
TC0X002250.hg.1	FGF13	2258	4.22884	4.50519	-1.21113	0.0492205
TC0X000672.hg.1	FGF13-AS1	100129662	2.66379	2.88525	-1.16591	0.0281343
TC10001611.hg.1	FGF8	2253	4.22777	4.41465	-1.1383	0.0413303
TC04001856.hg.1	FGFR3	2261	4.44568	4.67946	-1.17591	0.0414072
TC12001020.hg.1	FLJ37505	400087	2.03316	2.24562	-1.15866	0.0293815
TC08000622.hg.1	FLJ42969	441374	2.38909	2.62129	-1.17462	0.0475917
TC13001385.hg.1	FLT3	2322	3.32978	3.78907	-1.37487	0.0176642
TC0X001907.hg.1	FMR1	2332	4.02779	3.7646	1.20013	0.0370261
TC11003152.hg.1	FNBP4	23360	5.10989	4.67159	1.35501	0.0307802
TC09000099.hg.1	FOCAD	54914	3.80314	3.57905	1.16804	0.0190633
TC09001991.hg.1	FOXD4L6	653404	4.51898	4.75443	-1.17728	0.0335914
TC12001948.hg.1	FOXN4	121643	4.36655	4.5589	-1.14262	0.0286993
TC09000920.hg.1	FREM1	158326	3.7512	3.47977	1.207	0.0173639
TC04000935.hg.1	FRG1	2483	5.31429	4.99702	1.24597	0.0210135
TC20001182.hg.1	FRG1BP	284802	4.76916	4.42559	1.2689	0.0158847
TCUn_gl000241000001.hg.1	FRG1CP	100289097	4.95379	4.56747	1.30705	0.0273248
TC0X001099.hg.1	FRMD8P1	83957	4.22246	4.48011	-1.19553	0.0402963
TC0X002097.hg.1	FRMD8P1	83957	4.26181	4.47879	-1.1623	0.0470185
TC01002911.hg.1	FRRS1	391059	3.40579	3.18724	1.16356	0.0153307
TC08002430.hg.1	FSBP	100861412	3.13574	2.70462	1.34828	0.026718
TC09000536.hg.1	FSD1L	83856	3.1959	3.02126	1.12868	0.025
TC17001786.hg.1	FTSJ3	117246	3.89265	3.72769	1.12113	0.0460649
TC01002803.hg.1	FUBP1	8880	5.08834	4.77863	1.23946	0.0409091
TC16000372.hg.1	FUS	2521	5.08888	4.8359	1.19166	0.0186276
TC16001494.hg.1	FUS	2521	5.16101	4.93246	1.17166	0.0363732
TC14001735.hg.1	FUT8	2530	3.88212	3.6416	1.18142	0.0365215
TC19000461.hg.1	FXYD5	53827	5.327	5.56593	-1.18012	0.0129051
TC05001295.hg.1	FYB	2533	3.79148	3.56795	1.16758	0.0126848
TC05002698.hg.1	G3BP1	10146	4.76152	4.30354	1.37362	0.0123339
TC04000699.hg.1	GAB1	2549	3.87084	3.6969	1.12813	0.0414486
TC14001387.hg.1	GALC	2581	3.79545	3.57796	1.16271	0.0247757
TC18000145.hg.1	GALNT1	2589	4.37017	4.04366	1.25398	0.0237459
TC16000638.hg.1	GAN	8139	3.59207	3.37668	1.16101	0.0188487
TC04000565.hg.1	GAR1	54433	4.06739	3.91809	1.10903	0.0454785
TC07000198.hg.1	GARS	2617	4.01051	3.75645	1.19255	0.0133323
TC11000265.hg.1	GAS2	2620	3.16497	2.92821	1.17834	0.0270964
TC13001320.hg.1	GAS6-AS2	100506394	1.89779	2.08135	-1.13569	0.0256069
TC15002182.hg.1	---	---	1.95535	2.30937	-1.27812	0.0353874
TC06004051.hg.1	GCLC	2729	3.74909	3.55834	1.14136	0.047474
TC17000720.hg.1	GDPD1	284161	3.91941	3.58701	1.25911	0.00955432
TC02001948.hg.1	GFPT1	2673	4.11949	3.82907	1.223	0.00961871
TC06000426.hg.1	GGNBP1	449520	3.49893	3.71806	-1.16403	0.01
TC06002740.hg.1	GGNBP1	449520	3.81862	4.02014	-1.14991	0.0396824
TC0X000141.hg.1	GK	2710	3.65409	3.46815	1.13756	0.0468732
TC03003122.hg.1	GK5	256356	3.16563	2.98568	1.13284	0.0435248
TC08002609.hg.1	GLI4	2738	4.42048	4.58608	-1.12164	0.0183184
TC01003652.hg.1	GLRX2	51022	3.88133	3.66515	1.16165	0.040745
TC10000933.hg.1	GLRX3	10539	3.95264	3.713	1.1807	0.0441437
TC02000409.hg.1	GMCL1	64395	3.81226	3.50448	1.2378	0.0252504
TC06000110.hg.1	GMPR	2766	4.34182	4.10138	1.18135	0.0158691
TC03000851.hg.1	GMPS	8833	5.12228	4.67775	1.36088	0.0141905
TC03000339.hg.1	GNL3	26354	4.3461	4.07784	1.20436	0.045375
TC12001678.hg.1	GNS	2799	3.85824	3.62749	1.17345	0.00967296
TC15001738.hg.1	GOLGA6L10	647042	4.38339	4.18715	1.14571	0.0464649
TC15000767.hg.1	GOLGA6L9	440295	3.97843	3.72155	1.19489	0.017376
TC15000774.hg.1	GOLGA6L9	374650	4.20943	3.95806	1.19034	0.0204316
TC15002476.hg.1	GOLGA8A	23015	4.86006	4.49927	1.28413	0.00942857
TC15002756.hg.1	GOLGA8A	23015	5.03808	4.76069	1.212	0.019072
TC15002757.hg.1	GOLGA8B	440270	4.79982	4.4725	1.25468	0.00959474
TC17000350.hg.1	GOSR1	9527	3.84394	3.58681	1.1951	0.0121726
TC17001582.hg.1	GPATCH8	23131	4.58948	4.25398	1.26182	0.0140706
TC17002658.hg.1	---	---	4.59957	4.29782	1.23264	0.0183099
TC07002097.hg.1	GPR146	115330	4.00372	4.30984	-1.23638	0.0186801
TC02002539.hg.1	GPR155	151556	3.04929	2.90576	1.1046	0.0462142
TC02000787.hg.1	GPR17	2840	3.92544	4.06467	-1.10131	0.0405717
TC08002555.hg.1	GPR20	2843	4.12787	4.40051	-1.20802	0.0397384
TC05002095.hg.1	GPRIN1	114787	4.48267	4.755	-1.20776	0.0306053
TC6_cox_hap2000110.hg.1	GPX6	257202	2.62036	2.88042	-1.19752	0.0406612
TC07001132.hg.1	GRID2IP	392862	4.13098	4.27039	-1.10145	0.040294
TC05000818.hg.1	GRPEL2	134266	3.65702	3.48073	1.12998	0.0388981
TC16000875.hg.1	GSPT1	2935	4.4853	4.1098	1.29729	0.00951456
TC16001776.hg.1	GSPT1	2935	3.91118	3.51316	1.3177	0.0209389
TC08001110.hg.1	GSR	2936	4.79537	4.59835	1.14633	0.0285561
TC15001501.hg.1	GTF2A2	2958	3.94788	3.64311	1.23522	0.024328
TC13000171.hg.1	GTF2F2	2963	4.22133	3.90699	1.24345	0.0274056
TC11000239.hg.1	GTF2H1	2965	3.92286	3.67847	1.18459	0.0270989
TC05002425.hg.1	GTF2H2B	653238	4.89436	4.46736	1.34444	0.0140262
TC12000991.hg.1	GTF2H3	2967	3.7774	3.56473	1.15883	0.0359824
TC07000458.hg.1	GTF2I	2969	4.89395	4.61428	1.21391	0.0384325
TC07003359.hg.1	GTF2IP4	100093631	5.294	4.95069	1.26867	0.0454654
TC10000008.hg.1	GTPBP4	23560	4.14401	3.89894	1.18514	0.0412846
TC04000268.hg.1	GUF1	60558	3.93465	3.60118	1.26004	0.0224623
TC12001401.hg.1	GXYLT1	283464	4.1027	3.86027	1.18298	0.0173158
TC04002927.hg.1	GYPA	2993	3.04339	2.78524	1.19594	0.0395369
TC15000606.hg.1	HACD3	51495	4.2977	3.9285	1.29164	0.0270099
TC01001324.hg.1	HAPLN2	60484	4.16588	4.33126	-1.12146	0.0359125
TC20001708.hg.1	HAR1B	768097	2.71727	2.9822	-1.20158	0.0352678
TC02003690.hg.1	HAT1	8520	5.16171	4.72174	1.35657	0.0264347
TC09000933.hg.1	HAUS6	54801	3.90338	3.60304	1.23143	0.0123187
TC11001330.hg.1	HBB	3043	5.09306	4.52173	1.48589	0.0372593
TC11003024.hg.1	HBBP1	3044	3.99219	3.42043	1.48634	0.0248536
TC11001332.hg.1	HBBP1	3044	3.84093	3.30964	1.44521	0.0290683
TC11001331.hg.1	HBD	3045	4.28385	3.78785	1.4103	0.0254146
TC06002133.hg.1	HBS1L	10767	4.77498	4.30625	1.38389	0.0372593
TC6_mann_hap4000217.hg.1	HCG27	253018	5.13978	4.59548	1.45831	0.0276781
TC19001926.hg.1	HCN2	610	5.55295	6.06881	-1.42984	0.0420421
TC06003812.hg.1	HDAC2	3066	5.10743	4.69891	1.32732	0.0244436
TC06002035.hg.1	HDAC2	3066	4.17968	3.93524	1.18464	0.0448487
TC15001348.hg.1	HDC	3067	3.96004	3.71889	1.18193	0.0241804
TC01004007.hg.1	HEATR1	55127	4.22126	3.9214	1.23103	0.0143655
TC14001009.hg.1	HECTD1	25831	4.46322	4.11582	1.27227	0.0122915
TC10002226.hg.1	HELLS	3070	4.60606	4.33074	1.21026	0.0446647
TC17002754.hg.1	HELZ	9931	3.45822	3.13964	1.2471	0.0417343
TC15001092.hg.1	HERC2	8924	4.27802	4.05438	1.16768	0.00982456
TC15001058.hg.1	HERC2P2	400322	4.87124	4.54054	1.25763	0.00935678
TC15002437.hg.1	HERC2P2	400322	4.83547	4.5061	1.25646	0.00949474
TC15000142.hg.1	HERC2P2	400322	4.97911	4.46426	1.42884	0.0105344
TC15001011.hg.1	HERC2P3	283755	4.73509	4.35644	1.30012	0.00944792
TC15002423.hg.1	HERC2P3	283755	4.78069	4.46807	1.24196	0.0113546
TC16001061.hg.1	HERC2P4	100289574	4.56688	4.28674	1.21431	0.0184995
TC16000390.hg.1	HERC2P4	100289574	4.66592	4.38722	1.21309	0.034709
TC15002105.hg.1	HERC2P9	440248	4.66368	4.314	1.27428	0.0143415
TC15000144.hg.1	HERC2P9	440248	4.78738	4.48559	1.23267	0.0146273
TC10001341.hg.1	HERC4	26091	4.05455	3.80694	1.18724	0.0306315
TC08002534.hg.1	HHLA1	10086	2.50508	2.70534	-1.14891	0.0276189
TC14001198.hg.1	HIF1A-AS2	100750247	1.69015	1.92198	-1.17433	0.040858
TC07003195.hg.1	HIPK2	28996	3.66243	3.41871	1.18405	0.0465494
TC01002568.hg.1	HIVEP3	59269	3.52088	3.64268	-1.08809	0.0497914
TC10000419.hg.1	HK1	3098	3.87954	3.71966	1.1172	0.0180689
TC6_mcf_hap5000203.hg.1	HLA-F	3134	4.33061	4.50982	-1.13226	0.0465254
TC17000693.hg.1	HLF	3131	4.14196	4.40131	-1.19694	0.0191423
TC03001882.hg.1	HLTF	6596	4.41041	4.00216	1.32707	0.00990533
TC0X000127.hg.1	HMGA1P1	---	4.25674	4.02375	1.17527	0.0430472
TC02002516.hg.1	HMGB1P4	---	4.54393	4.14719	1.31653	0.0317468
TC0X001916.hg.1	HMGB3	3149	4.85287	4.32081	1.44599	0.0094251
TC05002454.hg.1	HMGCR	3156	4.79652	4.37077	1.34327	0.0398814
TC01000346.hg.1	HMGN2	3151	5.93423	5.67516	1.1967	0.0304418
TC03001845.hg.1	HMGN2P25	---	5.29471	4.97486	1.24821	0.0317565
TC06001896.hg.1	HMGN3	9324	5.39493	5.11376	1.21518	0.042849
TC16000131.hg.1	HMOX2	3163	4.70505	4.84948	-1.10529	0.0382132
TC12000461.hg.1	HNRNPA1	3178	7.06732	6.60448	1.37825	0.0106384
TC13000225.hg.1	HNRNPA1L2	144983	4.61636	4.28596	1.25737	0.0109234
TC12002381.hg.1	HNRNPA1P10	664709	8.99909	8.44796	1.46524	0.00968
TC07000517.hg.1	HNRNPA1P8	---	5.45436	5.13326	1.24928	0.0265214
TC02001062.hg.1	HNRNPA3	220988	6.56299	6.18284	1.30148	0.0140409
TC10002583.hg.1	HNRNPA3P1	10151	4.76239	4.45896	1.23408	0.0432318
TC13000715.hg.1	HNRNPA3P5	---	9.31519	8.71509	1.51582	0.0471808
TC05002774.hg.1	HNRNPAB	3182	5.47754	4.97922	1.41257	0.016464
TC14000915.hg.1	HNRNPC	3183	6.16782	5.84024	1.25491	0.0159675
TC10000403.hg.1	HNRNPH3	3189	5.65745	5.27456	1.30395	0.019824
TC09001284.hg.1	HNRNPK	3190	5.64945	5.35759	1.22422	0.0332019
TC02001755.hg.1	HNRNPLL	92906	3.60517	3.39827	1.1542	0.0430414
TC01002340.hg.1	HNRNPR	10236	4.99881	4.58829	1.32917	0.0123217
TC01000700.hg.1	HOOK1	51361	3.71054	3.37628	1.26073	0.00991946
TC12003297.hg.1	HOXC5	3222	2.54395	2.75683	-1.159	0.0317756
TC01002319.hg.1	HP1BP3	50809	5.07154	4.83767	1.17599	0.0360059
TC04001393.hg.1	HPGDS	27306	4.68179	4.35939	1.25041	0.0474056
TC03001063.hg.1	HRASLS	57110	3.13102	2.85614	1.2099	0.0132682
TC03001022.hg.1	HRG	3273	4.6365	4.83343	-1.14626	0.0264769
TC05000567.hg.1	HSD17B4	3295	4.93614	4.6908	1.18537	0.0388797
TC09002184.hg.1	HSDL2	84263	4.35158	3.99073	1.28418	0.00939516
TC09000565.hg.1	HSDL2	84263	4.22968	3.88739	1.26777	0.0101439
TC06000947.hg.1	HSF2	3298	4.19447	3.91294	1.21549	0.0210008
TC04002393.hg.1	HSP90AA4P	3323	3.0063	2.7429	1.20031	0.0474557
TC05000649.hg.1	HSPA4	3308	4.56029	4.25195	1.23829	0.0259218
TC04000643.hg.1	HSPA4L	22824	3.0444	2.86498	1.13243	0.0464907
TC19001453.hg.1	HSPB6	126393	4.55638	4.85315	-1.22839	0.0281222
TC13000539.hg.1	HSPH1	10808	4.66748	4.2388	1.34601	0.0143951
TC11001025.hg.1	HTR3A	3359	3.47099	3.60525	-1.09753	0.0375175
TC0X002079.hg.1	HUWE1	10075	5.26668	4.92633	1.26606	0.0229929
TC0X001067.hg.1	HUWE1	10075	4.37331	4.1736	1.14846	0.0430842
TC07000748.hg.1	HYALP1	26062	2.63114	2.29941	1.25852	0.0117418
TC09001331.hg.1	IARS	3376	4.18381	3.91065	1.20845	0.0290725
TC01001814.hg.1	IARS2	55699	3.81856	3.58285	1.17748	0.0252339
TC06001908.hg.1	IBTK	25998	3.86151	3.57735	1.2177	0.021922
TC02000041.hg.1	ID2	3398	3.6085	3.83448	-1.16958	0.040665
TC10001531.hg.1	IDE	3416	3.78232	3.55607	1.16979	0.0414379
TC11000058.hg.1	IGF2-AS	51214	4.34223	4.53148	-1.14017	0.0400762
TC14002213.hg.1	IGHM	3507	4.44599	4.71813	-1.2076	0.0416103
TC14002245.hg.1	IGHV1-3	28473	4.42919	4.6966	-1.20365	0.0271739
TC14002273.hg.1	IGHV5-51	28388	4.25151	4.44396	-1.14271	0.0265089
TC22000562.hg.1	IGLL1	3543	4.99131	5.29775	-1.23664	0.0139912
TC22001445.hg.1	IGLV3-1	28809	4.45747	4.67184	-1.1602	0.0474019
TC22000121.hg.1	IGLV3-12	28802	5.39918	5.77759	-1.29991	0.010903
TC22000112.hg.1	IGLV3-32	28787	4.40171	4.70016	-1.22982	0.00918103
TC22000103.hg.1	IGLV4-60	28785	4.68417	4.9854	-1.23219	0.0227805
TC11002471.hg.1	IGSF9B	22997	3.75453	3.8815	-1.092	0.0483755
TC09001455.hg.1	IKBKAP	8518	3.96753	3.77295	1.14439	0.0261608
TC02002219.hg.1	IL1B	3553	4.2894	4.00979	1.21387	0.0211436
TC01005333.hg.1	IL22RA1	58985	3.69794	4.00379	-1.23615	0.0097341
TC01002358.hg.1	IL22RA1	58985	3.54918	3.72705	-1.13122	0.0149495
TC08001350.hg.1	IL7	3574	3.31324	3.10049	1.1589	0.0273316
TC18000109.hg.1	IMPACT	55364	5.0126	4.67672	1.26215	0.0169371
TC17001040.hg.1	INCA1	388324	4.31631	4.48444	-1.1236	0.022226
TC15001246.hg.1	INO80	54617	3.84424	3.67767	1.12239	0.0267161
TC19001279.hg.1	INSL3	3640	4.63333	4.8925	-1.19679	0.020669
TC17001770.hg.1	INTS2	57508	3.95654	3.61055	1.27103	0.0133696
TC17002737.hg.1	INTS2	57508	3.92538	3.53855	1.30752	0.0294286
TC01006094.hg.1	INTS7	25896	3.97975	3.66662	1.2424	0.0164148
TC05003397.hg.1	IPO11	51194	3.65118	3.40421	1.18672	0.0410767
TC11000170.hg.1	IPO7	10527	4.83506	4.45322	1.303	0.0204769
TC11000171.hg.1	IPO7	10527	3.11371	2.82149	1.22452	0.0477006
TC12001353.hg.1	IPO8	10526	3.83234	3.6176	1.16049	0.0474771
TC03000325.hg.1	IQCF5-AS1	101928999	2.4937	2.71155	-1.16299	0.041624
TC15000864.hg.1	IQGAP1	8826	4.33877	4.07297	1.20231	0.0388523
TC15002301.hg.1	IREB2	3658	3.96994	3.65015	1.24814	0.0207511
TC07000789.hg.1	IRF5	3663	4.27361	4.40222	-1.09324	0.0449948
TC16000666.hg.1	IRF8	3394	3.80168	4.14251	-1.26648	0.0148974
TC05000030.hg.1	IRX1	79192	3.4634	3.71937	-1.19414	0.0393183
TC07001159.hg.1	ISPD	729920	3.51854	3.25645	1.19922	0.0313789
TC07002160.hg.1	ISPD-AS1	100506025	3.18855	2.9873	1.14969	0.0362283
TC07000108.hg.1	ISPD-AS1	100506025	3.02725	2.82939	1.14699	0.0401091
TC17001581.hg.1	ITGA2B	3674	4.88638	4.68199	1.1522	0.030426
TC02001100.hg.1	ITGAV	3685	3.474	3.27771	1.14575	0.033666
TC10001163.hg.1	ITGB1	3688	4.86284	4.51857	1.26951	0.0137753
TC0X001180.hg.1	ITM2A	9452	4.70408	4.28666	1.33553	0.0132128
TC12001328.hg.1	ITPR2	3709	4.46048	4.11447	1.27104	0.00972848
TC09000035.hg.1	JAK2	3717	3.78447	3.50462	1.21407	0.0247452
TC19001995.hg.1	JUNB	3726	4.14043	4.4485	-1.23805	0.0359775
TC12000068.hg.1	KCNA1	3736	3.9517	4.17392	-1.16653	0.0493831
TC01002977.hg.1	KCNA3	3738	2.68269	2.97785	-1.22702	0.0316417
TC19001744.hg.1	KCNC3	3748	3.7093	3.94477	-1.17729	0.0318477
TC03003225.hg.1	KCNMB3	27094	3.75953	3.53234	1.17055	0.0497477
TC01000292.hg.1	KDM1A	23028	4.79822	4.53362	1.20131	0.0316407
TC05000699.hg.1	KDM3B	51780	4.40718	4.23057	1.13023	0.0299149
TC15002807.hg.1	KIAA0101	9768	4.90795	4.6072	1.23178	0.0367954
TC09001482.hg.1	KIAA0368	23392	4.46837	4.24791	1.16511	0.0351624
TC14000351.hg.1	KIAA0586	9786	3.81176	3.58266	1.1721	0.0189625
TC04000774.hg.1	KIAA0922	23240	3.93336	3.71875	1.16039	0.0134015
TC08001434.hg.1	KIAA1429	25962	3.73308	3.52814	1.15264	0.0490736
TC03001632.hg.1	KIAA1524	57650	3.96761	3.64447	1.25105	0.0129197
TC02004936.hg.1	KIAA1841	84542	3.4512	3.29325	1.1157	0.0416402
TC02001555.hg.1	KIDINS220	57498	4.0864	3.87511	1.15773	0.0237399
TC10000659.hg.1	KIF11	3832	4.11057	3.73561	1.2968	0.0129218
TC06001298.hg.1	KIF13A	63971	4.04825	3.881	1.12292	0.0403135
TC01003679.hg.1	KIF14	9928	3.61528	3.24043	1.2967	0.0123105
TC11001517.hg.1	KIF18A	81930	3.81768	3.50864	1.23888	0.0215744
TC10000644.hg.1	KIF20B	9585	3.96858	3.60567	1.28601	0.00954696
TC10002200.hg.1	KIF20B	9585	3.97293	3.6159	1.28079	0.0280555
TC15000638.hg.1	KIF23	9493	4.03573	3.70086	1.26126	0.0102133
TC10001160.hg.1	KIF5B	3799	5.10254	4.72315	1.30078	0.0196499
TC01003505.hg.1	KIFAP3	22920	3.8664	3.55012	1.24512	0.0140439
TC08001500.hg.1	KLF10	7071	4.37204	4.57288	-1.14937	0.0412766
TC03001736.hg.1	KLF15	28999	4.37632	4.63565	-1.19692	0.0476076
TC14001082.hg.1	KLHL28	54813	3.09252	2.83184	1.19804	0.0432769
TC04001362.hg.1	KLHL8	57563	4.17995	3.96695	1.1591	0.031333
TC19001771.hg.1	KLK14	43847	3.85975	4.02998	-1.12524	0.0218924
TC12000138.hg.1	KLRG1	10219	3.47383	3.18344	1.22298	0.00918103
TC07002045.hg.1	KMT2C	58508	4.34103	4.11366	1.1707	0.0207429
TC03003052.hg.1	KPNA1	3836	4.15224	3.9102	1.18266	0.028557
TC17002860.hg.1	KPNA2	3838	4.75958	4.38953	1.2924	0.0213718
TC13000663.hg.1	KPNA3	3839	4.15204	3.90398	1.18761	0.0357266
TC01000419.hg.1	KPNA6	23633	4.06051	3.82357	1.1785	0.0129115
TC17000611.hg.1	KPNB1	3837	4.73811	4.45527	1.21659	0.0240447
TC17002684.hg.1	KPNB1	3837	6.16066	5.74624	1.33277	0.0306403
TC21000527.hg.1	KRTAP10-1	386677	5.15164	5.42481	-1.20846	0.0107133
TC17001483.hg.1	KRTAP2-1	81872	5.41375	5.74892	-1.26153	0.00960422
TC17001484.hg.1	KRTAP2-2	728279	4.98268	5.22792	-1.18529	0.0375394
TC17001485.hg.1	KRTAP2-3	730755	2.39804	2.65774	-1.19724	0.0476757
TC17001478.hg.1	KRTAP3-1	83896	3.08639	3.34047	-1.19258	0.0289798
TC17001493.hg.1	KRTAP4-4	84616	4.0497	4.33119	-1.21545	0.0440305
TC17001492.hg.1	KRTAP4-5	85289	4.43917	4.70536	-1.20263	0.0304351
TC17000502.hg.1	KRTAP4-9	100132386	4.75701	4.98405	-1.17043	0.0178641
TC11002767.hg.1	KRTAP5-10	387273	3.87642	4.16154	-1.21851	0.0177046
TC14000326.hg.1	KTN1	3895	5.23651	4.86305	1.29545	0.0243034
TC02000902.hg.1	KYNU	8942	3.59988	3.25038	1.27412	0.0096
TC14001117.hg.1	L2HGDH	79944	3.26563	3.11789	1.10783	0.0295774
TC12000392.hg.1	LARP4	113251	4.10825	3.80899	1.23052	0.0164583
TC12002357.hg.1	LARP4	113251	4.37452	4.05669	1.24645	0.0339858
TC05003291.hg.1	LARS	51520	5.08208	4.7379	1.26943	0.0336901
TC05001900.hg.1	LARS	51520	4.96405	4.66562	1.2298	0.0409062
TC01003887.hg.1	LBR	3930	4.67346	4.43874	1.17667	0.0408723
TC10001617.hg.1	LDB1	8861	5.1752	4.88792	1.22034	0.0180588
TC15000451.hg.1	LDHAL6B	92483	1.65093	1.93957	-1.22149	0.0207155
TC12000581.hg.1	LEMD3	23592	4.01248	3.73795	1.2096	0.0407722
TC19001503.hg.1	LGALS7	3963	4.1881	4.48706	-1.23026	0.0146255
TC19000533.hg.1	LGALS7B	653499	4.41554	4.70995	-1.22638	0.0292697
TC14001451.hg.1	LGMN	5641	3.05997	3.22353	-1.12005	0.0146062
TC17002181.hg.1	LHX1	3975	3.58547	3.79971	-1.16009	0.0375398
TC01004933.hg.1	LHX9	56956	3.12197	3.38495	-1.19995	0.00963298
TC19002720.hg.1	LILRA4	23547	3.87088	4.02709	-1.11436	0.0359951
TC19001840.hg.1	LILRB5	10990	3.8786	3.9983	-1.08651	0.0434906
TC20001737.hg.1	LIME1	54923	4.80856	5.01071	-1.15041	0.0463997
TC04001342.hg.1	LIN54	132660	4.07077	3.86736	1.15142	0.0286634
TC02004704.hg.1	---	---	1.51444	1.78387	-1.20533	0.0141445
TC03003282.hg.1	---	---	3.20686	2.91758	1.22203	0.010152
TC05003078.hg.1	---	---	1.99627	2.20585	-1.15635	0.0338407
TC02004410.hg.1	---	---	5.55194	4.94851	1.51932	0.011296
TC01005765.hg.1	---	---	3.91824	3.56382	1.27847	0.0353752
TC20001606.hg.1	---	---	3.51745	3.70164	-1.13618	0.0182965
TC02003499.hg.1	---	---	6.53409	5.92337	1.52702	0.00907884
TC05002848.hg.1	---	---	3.19046	3.50953	-1.24752	0.0113624
TC02003381.hg.1	---	---	4.69401	4.28165	1.33086	0.011082
TC07003028.hg.1	---	---	5.07288	4.70666	1.28897	0.0295838
TC07002926.hg.1	---	---	4.20212	4.0184	1.13581	0.0321747
TC02004885.hg.1	---	---	2.10816	2.2931	-1.13677	0.0474681
TC19002035.hg.1	---	---	3.8509	3.4537	1.31695	0.0307669
TC15002517.hg.1	---	---	4.5601	4.3714	1.13974	0.0307156
TC16001839.hg.1	---	---	5.36226	4.88954	1.38772	0.0117432
TC17002775.hg.1	---	---	2.51675	2.66872	-1.11109	0.0497365
TC08002279.hg.1	---	---	3.11746	2.84983	1.20383	0.012625
TC07002877.hg.1	---	---	3.78597	3.53526	1.18979	0.0188524
TC13001069.hg.1	---	---	4.85147	4.3549	1.41086	0.0166442
TC07002686.hg.1	---	---	5.93066	5.33091	1.51545	0.00927511
TC02004411.hg.1	---	---	5.00924	4.6875	1.24984	0.0258893
TC05003098.hg.1	---	---	8.56489	7.89979	1.58568	0.0092968
TC02004505.hg.1	---	---	3.67585	3.48657	1.1402	0.0242
TC11002707.hg.1	---	---	4.7059	4.18224	1.4376	0.0136091
TC15002435.hg.1	---	---	4.16451	3.88907	1.21036	0.0126086
TC22001186.hg.1	---	---	3.85669	3.49148	1.28807	0.00996296
TC21000796.hg.1	---	---	3.80421	4.08114	-1.21161	0.0426858
TC06003893.hg.1	---	---	1.88234	2.03739	-1.11346	0.0290716
TC16001809.hg.1	---	---	5.62254	5.18521	1.35409	0.0366236
TC06003605.hg.1	---	---	4.02995	3.67334	1.28041	0.0408564
TC08002541.hg.1	---	---	3.08146	2.84612	1.17718	0.0454518
TC08002523.hg.1	---	---	4.05324	3.78286	1.20613	0.0135982
TC16001415.hg.1	---	---	3.64675	3.80473	-1.11572	0.0492701
TC0X001686.hg.1	---	---	3.89058	3.58831	1.23308	0.0325605
TC07002428.hg.1	---	---	3.85948	3.52738	1.25885	0.0325714
TC01004849.hg.1	---	---	3.05125	2.85959	1.14208	0.024122
TC14002102.hg.1	---	---	4.063	3.78035	1.21643	0.0273402
TC14001801.hg.1	---	---	1.92552	2.0647	-1.10128	0.0316616
TC22001290.hg.1	---	---	4.61885	4.23239	1.30718	0.0240293
TC01005356.hg.1	---	---	4.69751	4.9826	-1.21848	0.0188633
TC02000535.hg.1	LINC00152	112597	4.62783	4.26636	1.28473	0.00908333
TC0Y000033.hg.1	LINC00279	100873963	1.96494	2.12998	-1.1212	0.0485928
TC10000645.hg.1	LINC00865	643529	2.40941	2.68612	-1.21142	0.0120721
TC08002336.hg.1	LINC00968	101929398	2.04158	2.16663	-1.09055	0.0487146
TC07001694.hg.1	LINC01007	100506527	2.87556	3.06597	-1.14109	0.0352635
TC02001502.hg.1	LINC01115	339822	3.22282	3.39371	-1.12575	0.0343905
TC02004012.hg.1	LINC01246	102800315	1.74773	1.93385	-1.1377	0.0224277
TC10001199.hg.1	LINC01264	104266963	3.43285	3.66997	-1.17863	0.0268032
TC06002034.hg.1	LINC01268	285758	3.14878	2.89006	1.19642	0.0408115
TC14000857.hg.1	LINC01296	503639	4.00762	3.66197	1.27072	0.00948507
TC14001907.hg.1	LINC01296	642477	3.9847	3.57715	1.32643	0.0148974
TC22000438.hg.1	LINC01296	503639	4.55605	4.22676	1.2564	0.0158791
TC18000528.hg.1	LINC01415	100132501	1.95563	2.20509	-1.18877	0.0263386
TC04000302.hg.1	LINC01618	152578	2.02731	2.22549	-1.14725	0.0398906
TC20001047.hg.1	LKAAEAR1	198437	4.82412	5.20704	-1.30398	0.0175156
TC07002073.hg.1	LMBR1	64327	4.13727	3.84456	1.22494	0.0109218
TC07000746.hg.1	LMOD2	442721	2.6934	2.83233	-1.10109	0.0487874
TC13000511.hg.1	LNX2	222484	3.88941	3.68005	1.15617	0.0165988
TC12003200.hg.1	LOC100128843	100128843	3.94474	4.21027	-1.20208	0.00963946
TC07001427.hg.1	LOC100130849	100130849	4.35573	4.56743	-1.15806	0.0375311
TC16000936.hg.1	LOC100190986	100190986	5.02813	4.62086	1.32617	0.0295721
TC02002156.hg.1	LOC100287010	100287010	2.02977	2.25655	-1.17022	0.0273496
TC02004459.hg.1	LOC100287010	100287010	2.24548	2.49057	-1.18516	0.0290683
TC01000025.hg.1	LOC100288175	100288175	4.87071	5.12725	-1.19461	0.022927
TC15002761.hg.1	LOC100288637	100288637	4.05788	3.86184	1.14555	0.049555
TC04001728.hg.1	LOC100506085	100506085	1.8777	2.05772	-1.1329	0.0454725
TC12000355.hg.1	LOC100506125	100506125	3.5314	3.78614	-1.19312	0.0271278
TC02003440.hg.1	LOC100506286	100506286	2.82759	3.10245	-1.20987	0.0247556
TC22001113.hg.1	LOC100506472	100506472	2.28303	2.5247	-1.18236	0.0290922
TC14001382.hg.1	LOC100506731	100506731	2.17415	2.43826	-1.2009	0.0188585
TC14000769.hg.1	LOC100507277	100507277	2.45173	2.64263	-1.14148	0.0436636
TC09000472.hg.1	LOC100507346	100507346	3.22669	3.44625	-1.16438	0.0287928
TC09002114.hg.1	LOC100507346	100507346	3.14006	3.34777	-1.15485	0.0464574
TC17000335.hg.1	LOC101927018	101927018	3.48317	3.17774	1.23578	0.0164316
TC17002147.hg.1	LOC101927018	101927018	3.46696	3.2033	1.20052	0.0492122
TC02003424.hg.1	LOC101927053	101927053	3.45633	3.68702	-1.17339	0.0236864
TC02001082.hg.1	LOC101927156	101927156	2.75683	2.60149	1.11368	0.0492229
TC06004093.hg.1	LOC101927189	101927189	5.61628	5.87592	-1.19718	0.033244
TC02004460.hg.1	LOC101927331	101927331	1.7869	2.00444	-1.16275	0.0475909
TC06000053.hg.1	LOC101928047	101928047	3.37916	3.06368	1.24443	0.0254914
TC0X000533.hg.1	LOC101928358	101928358	2.32546	2.71038	-1.30578	0.0107566
TC01001570.hg.1	LOC101928973	101928973	5.06972	5.33318	-1.20035	0.0193418
TC06003659.hg.1	LOC101929705	101929705	3.07692	3.25769	-1.13349	0.0440237
TC04001834.hg.1	LOC101930028	101930028	2.02924	2.2446	-1.161	0.0369747
TC03001336.hg.1	LOC102724231	102724231	3.92832	4.24095	-1.24198	0.0207652
TC06001191.hg.1	LOC102724357	102724357	1.52771	1.80954	-1.21574	0.0269299
TC12001691.hg.1	LOC102724421	102724421	1.9388	2.11425	-1.12932	0.0168437
TC01000103.hg.1	LOC102724539	102724539	3.0644	3.26948	-1.15275	0.0348219
TC17000760.hg.1	LOC105371855	105371855	2.60489	2.7746	-1.12483	0.0491592
TC19001351.hg.1	LOC105372321	105372321	3.81708	3.54135	1.21061	0.0334503
TC04000163.hg.1	LOC105374516	105374516	2.31491	2.53876	-1.16784	0.0410704
TC09000062.hg.1	LOC105375972	105375972	1.61831	1.86626	-1.18752	0.0359192
TC06002325.hg.1	LOC105378138	105378138	1.96352	2.28679	-1.25116	0.00976429
TC7_gl000195_random000001.hg.1	LOC105379499	105379499	4.82922	4.38429	1.36125	0.012441
TC16001602.hg.1	LOC106699570	106699570	1.7646	2.06821	-1.23423	0.0106989
TC02002855.hg.1	LOC151475	151475	2.00936	2.20712	-1.14691	0.0437872
TC09002744.hg.1	LOC158402	158402	3.13902	2.89593	1.18353	0.0242498
TCUn_gl000219000002.hg.1	LOC283788	283788	6.10047	5.49652	1.51987	0.0132688
TC22000614.hg.1	LOC284898	284898	3.44535	3.69961	-1.19273	0.0479292
TC02002062.hg.1	LOC285074	285074	4.71845	4.40345	1.24402	0.00962712
TC02004387.hg.1	LOC285074	285074	4.77228	4.46897	1.23396	0.00965241
TC06003656.hg.1	LOC285857	285857	2.97702	3.1114	-1.09762	0.0498036
TC16000685.hg.1	LOC339059	339059	4.647	4.85382	-1.15414	0.0370071
TC04002522.hg.1	LOC344967	344967	3.74383	3.96345	-1.16443	0.0427334
TC09000390.hg.1	LOC389765	389765	4.17209	3.79233	1.30113	0.0227157
TC7_gl000195_random000003.hg.1	LOC389831	389831	4.44722	4.01688	1.34755	0.011513
TC03003328.hg.1	LOC401052	401052	4.50307	4.67159	-1.12391	0.0370314
TC17002605.hg.1	LOC440434	440434	4.87282	4.51417	1.28223	0.0129073
TC17002899.hg.1	LOC440434	440434	5.05473	4.79459	1.1976	0.049777
TC12002225.hg.1	LOC642846	642846	4.29052	4.13893	1.11079	0.0317797
TC01003818.hg.1	LOC643454	643454	3.99299	3.72993	1.20002	0.0188242
TC16001118.hg.1	LOC643802	643802	3.23706	2.92866	1.23833	0.0300553
TC15002427.hg.1	LOC646214	646214	3.35654	3.1351	1.1659	0.047427
TC11000425.hg.1	LOC646813	646813	2.91594	2.70543	1.1571	0.0490534
TC05002766.hg.1	LOC728554	728554	5.00551	4.57786	1.34503	0.00937849
TC12001155.hg.1	LPCAT3	10162	4.61537	4.37149	1.18417	0.0219188
TC02001795.hg.1	LRPPRC	10128	4.79189	4.33527	1.37233	0.00948077
TC09002868.hg.1	LRRC26	389816	4.93225	5.33012	-1.31757	0.040123
TC10001130.hg.1	LRRC37A6P	387646	2.18908	2.40528	-1.16167	0.0401211
TC01002769.hg.1	LRRC40	55631	3.87799	3.57994	1.22948	0.0324636
TC11001876.hg.1	LRRN4CL	221091	3.19231	3.39821	-1.1534	0.0297248
TC19000440.hg.1	LSM14A	26065	5.22502	4.95869	1.20274	0.0287884
TC6_dbb_hap3000148.hg.1	LTB	4050	4.77838	5.02001	-1.18233	0.0240247
TC6_mann_hap4000136.hg.1	LTB	4050	4.77838	5.02001	-1.18233	0.0240247
TC6_apd_hap1000081.hg.1	LTB	4050	4.78679	5.01462	-1.17107	0.0264055
TC6_cox_hap2000159.hg.1	LTB	4050	4.78679	5.01462	-1.17107	0.0264055
TC6_mcf_hap5000136.hg.1	LTB	4050	4.78679	5.01462	-1.17107	0.0264055
TC6_qbl_hap6000151.hg.1	LTB	4050	4.78679	5.01462	-1.17107	0.0264055
TC6_ssto_hap7000131.hg.1	LTB	4050	4.78679	5.01462	-1.17107	0.0264055
TC17002271.hg.1	LUC7L3	51747	6.26939	5.68583	1.49854	0.0464291
TC05002617.hg.1	LYRM7	90624	5.3796	4.75043	1.54668	0.00968132
TC17002895.hg.1	LYRM9	201229	3.00252	3.13708	-1.09775	0.0406024
TC04001507.hg.1	MAD2L1	4085	4.24823	3.90433	1.26919	0.0113557
TC19000004.hg.1	MADCAM1	8174	4.51422	4.74829	-1.17615	0.0181267
TC08001715.hg.1	MAFA	389692	3.19074	3.41084	-1.16482	0.0422134
TC0X001048.hg.1	MAGED4	81557	3.97412	4.11989	-1.10632	0.0176677
TC0X000419.hg.1	MAGEE1	57692	3.72024	3.99625	-1.21084	0.0129167
TC07002431.hg.1	MAGI2-AS3	100505881	3.67623	3.82945	-1.11205	0.0285487
TC12001225.hg.1	MAGOHB	55110	4.11094	3.79265	1.24685	0.0332841
TC09002588.hg.1	MAMDC2-AS1	100507244	3.55102	3.24464	1.2366	0.0285464
TC05000515.hg.1	MAN2A1	4124	4.04805	3.76251	1.21887	0.0107216
TC01000478.hg.1	MANEAL	149175	3.91073	4.04767	-1.09957	0.0483826
TC20000243.hg.1	MAP1LC3A	84557	3.88632	4.05136	-1.1212	0.0415494
TC15000613.hg.1	MAP2K1	5604	4.47551	4.30727	1.12369	0.0193733
TC06001948.hg.1	MAP3K7	6885	4.4128	4.11166	1.23212	0.0165976
TC02000617.hg.1	MAP4K4	9448	4.43201	4.23048	1.14992	0.0111895
TC14001120.hg.1	MAP4K5	11183	4.60587	4.29542	1.24009	0.0113492
TC22000433.hg.1	MAPK8IP2	23542	4.22106	4.39803	-1.13051	0.0460118
TC05000074.hg.1	MARCH6	10299	4.90553	4.59922	1.23654	0.0185
TC06003006.hg.1	MARCKS	4082	4.23384	3.84493	1.30941	0.01
TC06000909.hg.1	MARCKS	4082	4.63594	4.18655	1.36546	0.0265128
TC14000799.hg.1	MARK3	4140	4.36935	4.12167	1.18729	0.0339949
TC01005262.hg.1	MASP2	10747	3.82013	4.03511	-1.16069	0.0476798
TC18000521.hg.1	MBD2	8932	4.5055	4.20314	1.23315	0.0278
TC02001556.hg.1	MBOAT2	129642	3.9244	3.56228	1.28531	0.0122836
TC02004035.hg.1	MBOAT2	129642	4.05864	3.58595	1.38769	0.0135723
TC05000334.hg.1	MCCC2	64087	3.60431	3.37306	1.17385	0.0207081
TC06001799.hg.1	MCM3	4172	4.67372	4.42844	1.18532	0.01866
TC02002376.hg.1	MCM6	4175	4.88557	4.55844	1.25451	0.026111
TC20000063.hg.1	MCM8	84515	3.87852	3.61812	1.19781	0.0188254
TC10001707.hg.1	MCMBP	79892	4.41586	4.19737	1.16351	0.0277947
TC01005594.hg.1	MCOLN3	55283	1.48148	1.75634	-1.20987	0.0306169
TC08000021.hg.1	MCPH1	79648	3.54061	3.34575	1.14461	0.0393421
TC06001282.hg.1	MCUR1	63933	4.42488	4.17421	1.18976	0.0326727
TC11000397.hg.1	MDK	4192	5.25745	5.55782	-1.23146	0.0397472
TC12000606.hg.1	MDM2	4193	4.39924	4.00679	1.31262	0.0113898
TC12002437.hg.1	MDM2	4193	4.22074	3.89257	1.25542	0.0216871
TC06001944.hg.1	MDN1	23195	3.96858	3.71879	1.18903	0.00958356
TC17001449.hg.1	MED1	5469	4.07334	3.84276	1.17331	0.0417523
TC17001772.hg.1	MED13	9969	4.30889	4.05779	1.19011	0.048445
TC13000653.hg.1	MED4	29079	4.68523	4.39362	1.22401	0.0174011
TC17002074.hg.1	MEIS3P1	4213	3.42272	3.06609	1.28043	0.0111992
TC17000179.hg.1	MEIS3P1	4213	3.06594	2.72152	1.26964	0.0171283
TC02004154.hg.1	MEMO1	51072	4.67827	4.34808	1.25718	0.0109237
TC04000512.hg.1	METAP1	23173	4.54125	4.22995	1.24082	0.00966563
TC12000738.hg.1	METAP2	10988	5.4553	5.09188	1.28647	0.0136632
TC10002970.hg.1	METTL10	399818	4.14016	3.88687	1.19192	0.0373696
TC14000074.hg.1	METTL17	64745	4.08636	3.91746	1.1242	0.0325937
TC18000282.hg.1	METTL4	64863	3.61867	3.39964	1.16395	0.0352531
TC02002522.hg.1	METTL8	79828	4.05858	3.85094	1.15479	0.0123532
TC01000898.hg.1	MFSD14A	64645	4.34389	4.08628	1.19549	0.02117
TC09000463.hg.1	MFSD14B	84641	4.24772	4.03742	1.15693	0.0334388
TC09002685.hg.1	MFSD14C	84278	4.62247	4.36504	1.19535	0.0434742
TC22001061.hg.1	MGC20647	91370	4.6352	4.92168	-1.21966	0.0119006
TC03001599.hg.1	MINA	84864	3.9081	3.74866	1.11685	0.0369446
TC13000484.hg.1	MIPEP	4285	3.60086	3.3632	1.17908	0.00928571
TC0X001386.hg.1	MIR106A	406899	1.37409	1.65297	-1.21325	0.0350666
TC0X001548.hg.1	MIR1184-1	100302111	4.76676	4.47127	1.2273	0.0417414
TC0X000788.hg.1	MIR1184-3	100422977	4.76676	4.47127	1.2273	0.0417414
TC0X001553.hg.1	MIR1184-3	100422985	4.76676	4.47127	1.2273	0.0417414
TC05002139.hg.1	MIR1229	100302156	6.56207	6.96621	-1.3233	0.0400934
TC12000662.hg.1	MIR1252	100302136	1.37923	1.67815	-1.23023	0.0442328
TC11000366.hg.1	MIR129-2	406918	2.45001	2.74854	-1.22988	0.0312493
TC19000001.hg.1	MIR1302-11	100422919	1.40688	1.78788	-1.30225	0.0113452
TC01000002.hg.1	MIR1302-11	105376912	3.64626	3.82057	-1.12842	0.0492003
TC02002225.hg.1	MIR1302-3	100302128	1.54155	1.89904	-1.2812	0.0196396
TC02002710.hg.1	MIR1302-4	100302130	1.67695	1.96738	-1.22301	0.0194855
TC18000174.hg.1	MIR1539	100302257	3.44306	3.88949	-1.36267	0.0276423
TC15000722.hg.1	MIR1827	100302217	1.93683	2.15573	-1.16385	0.0358044
TC22000097.hg.1	MIR301B	100126318	1.95637	2.1945	-1.17946	0.0496739
TC02002787.hg.1	MIR3131	100422957	4.39909	4.69222	-1.2253	0.0328397
TC09001626.hg.1	MIR3154	100422893	5.20997	5.5891	-1.30056	0.00934884
TC22000477.hg.1	MIR3198-1	100423025	4.13669	3.88425	1.19122	0.0498962
TC08001037.hg.1	MIR320A	407037	5.00487	5.36613	-1.28455	0.0251046
TC20000331.hg.1	MIR3646	100500813	1.6168	1.87391	-1.19508	0.0192433
TC06001039.hg.1	MIR3668	100500879	1.29932	1.60377	-1.23495	0.0380437
TC06001125.hg.1	MIR3692	100500899	2.50307	2.75103	-1.18753	0.04154
TC14000749.hg.1	MIR382	494331	1.92112	2.15753	-1.17806	0.0444854
TC05002057.hg.1	MIR3912	100500831	1.33779	1.61474	-1.21164	0.0399021
TC07001481.hg.1	MIR3914-1	100500836	1.38878	1.74666	-1.28154	0.0123333
TC14000716.hg.1	MIR411	693121	1.40881	1.69208	-1.21695	0.0413265
TC08001088.hg.1	MIR4287	100422828	1.86433	2.12874	-1.20115	0.0397148
TC02002209.hg.1	MIR4435-2	100616341	2.88961	2.64274	1.18663	0.0495192
TC02002207.hg.1	MIR4435-2HG	541471	4.14706	3.85861	1.22132	0.00972376
TC02003382.hg.1	---	---	4.88248	4.47141	1.32967	0.0162609
TC05002223.hg.1	MIR4458HG	100505738	3.13798	3.37961	-1.18233	0.0166643
TC10000914.hg.1	MIR4484	100616327	1.54566	1.78307	-1.17887	0.0459586
TC14001052.hg.1	MIR4503	100616280	1.40845	1.71014	-1.23258	0.0482744
TC14000449.hg.1	MIR4505	100616158	3.60758	3.91513	-1.23761	0.0310017
TC0X001388.hg.1	MIR450B	100126302	1.53835	1.88628	-1.27274	0.0099375
TC17000075.hg.1	MIR4520-2	100616466	1.4473	1.75041	-1.2338	0.0107948
TC05001103.hg.1	MIR4635	100616479	4.64857	5.10276	-1.37001	0.0432518
TC07000554.hg.1	MIR4652	100616206	1.6223	1.96558	-1.26864	0.00945024
TC09000043.hg.1	MIR4665	100616288	5.07409	5.5442	-1.38522	0.0368235
TC10000634.hg.1	MIR4679-1	100616128	1.43174	1.74091	-1.23899	0.0196556
TC11000964.hg.1	MIR4693	100616457	1.5918	1.83192	-1.18109	0.0332712
TC11002086.hg.1	MIR4696	100616402	1.48472	1.77849	-1.22584	0.0286939
TC16000625.hg.1	MIR4719	100616172	1.34462	1.64256	-1.22939	0.0379944
TC17001428.hg.1	MIR4734	100616203	5.63516	6.13277	-1.41187	0.0427269
TC22000689.hg.1	MIR4764	100616295	1.81927	2.08631	-1.20334	0.0407881
TC03001134.hg.1	MIR4790	100616334	1.229	1.53431	-1.23568	0.0291039
TC01000726.hg.1	MIR4794	100616338	1.77278	2.11933	-1.27152	0.0236862
TC05000337.hg.1	MIR4803	100616377	1.63377	1.96793	-1.26064	0.0249079
TC19000818.hg.1	MIR498	574460	2.2378	2.51783	-1.21422	0.0435857
TC20000790.hg.1	MIR499B	100616134	1.8134	2.07026	-1.19488	0.0176642
TC0X001465.hg.1	MIR508	574513	1.78649	2.08855	-1.2329	0.0328389
TC0X001470.hg.1	MIR514A1	574516	1.83279	2.16903	-1.26247	0.0268892
TC19000831.hg.1	MIR518F	574472	1.23742	1.49897	-1.19877	0.0348436
TC19000824.hg.1	MIR519C	574466	1.43631	1.68981	-1.1921	0.0475971
TC19000834.hg.1	MIR526A1	574475	1.34355	1.67315	-1.25666	0.0166911
TC03000570.hg.1	MIR567	693152	1.82968	2.08786	-1.19597	0.0359028
TC07001119.hg.1	MIR589	693174	2.84519	3.08592	-1.18159	0.0313804
TC10000489.hg.1	MIR606	693191	4.3787	4.66569	-1.2201	0.0402237
TC20000241.hg.1	MIR644A	693229	4.46514	3.93776	1.44131	0.0314952
TC22000530.hg.1	MIR649	693234	1.31299	1.61446	-1.2324	0.0150298
TC01000865.hg.1	MIR760	100126348	3.67517	3.95736	-1.21604	0.0120418
TC21000143.hg.1	MIR802	768219	1.8154	2.08118	-1.20229	0.0431674
TC05001818.hg.1	MIR874	100126343	3.50053	3.78775	-1.22029	0.0199982
TC0X001453.hg.1	MIR892A	100126342	1.91485	2.1896	-1.20978	0.0121705
TC21000042.hg.1	MIRLET7C	406885	1.74825	2.01892	-1.20636	0.04073
TC09002667.hg.1	MIRLET7DHG	158257	4.4172	4.66147	-1.1845	0.0194016
TC03001450.hg.1	MIRLET7G	406890	2.3349	2.61454	-1.21389	0.0416441
TC21000395.hg.1	MIS18A	54069	4.01241	3.76548	1.18668	0.0137692
TC10000152.hg.1	MLLT10	8028	4.2752	4.06997	1.15287	0.0436512
TC06001959.hg.1	MMS22L	253714	3.41755	3.15242	1.20174	0.0176828
TC15001476.hg.1	MNS1	55329	4.39536	4.134	1.19861	0.0354007
TC04002912.hg.1	MOB1B	92597	4.08698	3.82392	1.20002	0.0273282
TC12000556.hg.1	MON2	23041	3.76562	3.53641	1.17219	0.0412438
TC01005919.hg.1	MPC2	25874	4.98331	4.49487	1.40292	0.0108148
TC11001818.hg.1	MPEG1	219972	2.79601	3.07498	-1.21333	0.013396
TC16000004.hg.1	MPG	4350	4.66452	4.90996	-1.18545	0.0282026
TC17001727.hg.1	MPO	4353	5.22639	5.64998	-1.34127	0.0108528
TC10001136.hg.1	MPP7	143098	3.51427	3.34459	1.12482	0.0389736
TC10000132.hg.1	MRC1	4360	2.85175	2.72062	1.09515	0.0287894
TC10000135.hg.1	MRC1	4360	2.81714	2.68417	1.09655	0.028938
TC11002199.hg.1	MRE11A	4361	4.13825	3.85619	1.21593	0.0399367
TC02000476.hg.1	MRPL19	9801	4.16577	3.9741	1.14208	0.0492041
TC03001787.hg.1	MRPL3	11222	4.90534	4.5999	1.2358	0.0176477
TC02003431.hg.1	MRPL30	---	4.44083	3.93763	1.41735	0.0372593
TC07000259.hg.1	MRPL32	64983	4.51415	4.30438	1.15651	0.0415499
TC12000725.hg.1	MRPL42	28977	4.6345	4.28657	1.27274	0.0210693
TC12002517.hg.1	MRPL42	28977	4.69783	4.34441	1.27759	0.0478816
TC03002039.hg.1	MRPL47	57129	4.48866	4.12672	1.28516	0.0249057
TC06001731.hg.1	MRPS10	55173	4.41268	4.00726	1.32448	0.00974631
TC12000270.hg.1	MRPS35	60488	4.79219	4.42504	1.2898	0.0276609
TC02000642.hg.1	MRPS9	64965	4.53022	4.2993	1.17359	0.0256908
TC11000512.hg.1	MS4A13	503497	1.79034	2.00442	-1.15997	0.0173932
TC02003219.hg.1	MSH2	4436	4.90904	4.48864	1.3383	0.0272258
TC11001746.hg.1	MTCH2	23788	5.06461	4.69677	1.29042	0.0106989
TC06002142.hg.1	MTFR2	113115	3.46862	3.21081	1.19566	0.0325543
TC14000388.hg.1	MTHFD1	4522	4.63395	4.37228	1.19886	0.0190167
TC02003335.hg.1	MTHFD2	10797	4.32736	3.95693	1.29274	0.01
TC02000454.hg.1	MTHFD2	10797	4.13517	3.87837	1.19482	0.0166682
TC10001150.hg.1	MTPAP	729668	4.05792	3.86674	1.1417	0.0153244
TC01001956.hg.1	MTR	4548	4.10495	3.86991	1.17695	0.028938
TC08002510.hg.1	MTSS1	9788	3.59215	3.21746	1.29656	0.0123951
TC02003706.hg.1	MTX2	10651	4.08968	3.75587	1.26033	0.0176501
TC02001057.hg.1	MTX2	10651	3.99645	3.72263	1.20901	0.0229414
TC03003289.hg.1	MUC4	4585	5.31241	5.88867	-1.49098	0.0215419
TC06001782.hg.1	MUT	4594	4.23747	3.93776	1.2309	0.0123303
TC17002479.hg.1	MYH10	4628	3.80279	3.44222	1.28393	0.0388402
TC17001118.hg.1	MYH10	4628	3.8053	3.60502	1.14891	0.048575
TC18000016.hg.1	MYL12A	10627	5.48881	5.12768	1.28443	0.0369321
TC03003056.hg.1	MYLK	4638	3.15881	3.36222	-1.15141	0.0296129
TC11000232.hg.1	MYOD1	4654	3.85492	4.12496	-1.20584	0.0356222
TC01002707.hg.1	MYSM1	114803	4.28664	4.02318	1.20035	0.0339888
TC04000683.hg.1	NAA15	80155	4.22856	3.96212	1.20283	0.0364642
TC09000391.hg.1	NAA35	60560	4.27517	3.99997	1.21016	0.0136257
TC03001664.hg.1	NAA50	80218	5.32997	5.0541	1.21073	0.0331008
TC05001270.hg.1	NADK2	133686	4.1854	3.77559	1.32851	0.0217551
TC16001174.hg.1	NAE1	8883	4.13588	3.76435	1.29373	0.014061
TC11001287.hg.1	NAP1L4	4676	4.48315	4.23875	1.1846	0.0182177
TC01000575.hg.1	NASP	4678	4.90626	4.61865	1.22061	0.0402999
TC02001592.hg.1	NBAS	51594	4.12667	3.82398	1.23344	0.00966258
TC11002473.hg.1	NCAPD3	23310	4.07815	3.90098	1.13066	0.0288733
TC04000155.hg.1	NCAPG	64151	4.17962	3.78056	1.31865	0.00993401
TC07002083.hg.1	NCAPG2	54892	3.65443	3.47098	1.1356	0.0409095
TC09000492.hg.1	NCBP1	4686	4.52911	4.26634	1.19978	0.0247604
TC19000538.hg.1	NCCRP1	342897	3.95304	4.16515	-1.15839	0.0333742
TC22000270.hg.1	NCF4	4689	4.82822	4.56045	1.20394	0.0164921
TC03003323.hg.1	NCK1	4690	4.03109	3.82684	1.15208	0.0448092
TC17001171.hg.1	NCOR1	9611	4.4466	4.24913	1.14669	0.0379888
TC20001521.hg.1	NCOR1P1	149934	4.4158	4.13136	1.21794	0.0292498
TC01002676.hg.1	NDC1	55706	4.35133	4.05102	1.2314	0.0133834
TC01005497.hg.1	NDC1	55706	4.50828	4.1719	1.26259	0.0159923
TC18000009.hg.1	NDC80	10403	3.87943	3.54907	1.25733	0.0378134
TC05000777.hg.1	NDFIP1	80762	4.07481	3.7506	1.25199	0.00971521
TC13000303.hg.1	NDFIP2	54602	3.38535	3.22143	1.12033	0.0270132
TC12001622.hg.1	NDUFA4L2	56901	4.32699	4.49851	-1.12625	0.0249261
TC05002395.hg.1	NDUFAF2	91942	5.7028	5.08387	1.53573	0.0113109
TC05000260.hg.1	NDUFAF2	91942	5.35027	5.04788	1.23319	0.0235887
TC20001111.hg.1	NDUFAF5	79133	3.4994	3.23096	1.20451	0.0403234
TC02002697.hg.1	NDUFS1	4719	4.15015	3.93282	1.16258	0.0326026
TC12000749.hg.1	NEDD1	121441	4.00225	3.73855	1.20055	0.0265003
TC18000730.hg.1	NEDD4L	23327	2.75054	2.44049	1.23975	0.0190492
TC01003798.hg.1	NEK2	4751	3.83158	3.57461	1.19497	0.0145824
TC12001619.hg.1	NEMP1	23306	4.42191	4.13282	1.22187	0.0229905
TC10001855.hg.1	NET1	10276	4.85966	4.44662	1.33149	0.00946667
TC10000047.hg.1	NET1	10276	5.09858	4.64193	1.37235	0.0202264
TC05001803.hg.1	NEUROG1	4762	3.33797	3.61199	-1.20917	0.0435207
TC12001567.hg.1	NFE2	4778	4.23607	3.99077	1.18534	0.0408894
TC01000702.hg.1	NFIA	4774	4.31913	4.14813	1.12584	0.0307339
TC04001171.hg.1	NFXL1	152518	3.75843	3.56867	1.14058	0.0485889
TC12001906.hg.1	NFYB	4801	4.62442	4.26486	1.28303	0.00944498
TC14001341.hg.1	NGB	58157	4.11571	4.344	-1.17145	0.00962542
TC0X001311.hg.1	NKRF	55922	3.64118	3.37133	1.20568	0.0264908
TC10001727.hg.1	NKX1-2	390010	4.56416	4.78135	-1.16247	0.0408953
TC20000692.hg.1	NKX2-2	4821	4.40027	4.69671	-1.22811	0.0403749
TC10001775.hg.1	NKX6-2	84504	5.52966	5.96067	-1.34817	0.0312537
TC03000881.hg.1	NMD3	51068	4.58429	4.32358	1.19807	0.0188729
TC01003495.hg.1	NME7	29922	4.37353	4.14253	1.17365	0.0497657
TC05000202.hg.1	NNT	23530	4.37233	4.10028	1.20752	0.0122978
TC02001572.hg.1	NOL10	79954	3.94647	3.65797	1.22137	0.0123484
TC16000532.hg.1	NOL3	8996	4.41381	4.60053	-1.13818	0.0328112
TC16000180.hg.1	NOMO1	23420	4.82948	4.57077	1.19641	0.00957386
TC16000912.hg.1	NOMO2	283820	4.75409	4.48802	1.20253	0.00951311
TC16000194.hg.1	NOMO3	283820	4.75701	4.50468	1.19113	0.00968323
TC02001188.hg.1	NOP58	51602	4.60618	4.24958	1.28041	0.0226363
TC09001753.hg.1	NPDC1	56654	4.66935	4.86285	-1.14353	0.0216532
TC16002096.hg.1	NPIPA1	339044	5.44501	5.04612	1.31849	0.0096
TC16000202.hg.1	NPIPA1	339044	5.46328	5.10491	1.28197	0.0191681
TC16002042.hg.1	NPIPA1	9284	5.49676	5.12584	1.29317	0.0292567
TC16000178.hg.1	NPIPA1	9284	5.70251	5.41217	1.22293	0.0483892
TC16000896.hg.1	---	---	5.55892	5.23376	1.2528	0.0360088
TC16002065.hg.1	NPIPB11	728888	5.39246	5.04131	1.27558	0.0432459
TC02002869.hg.1	NPPC	4880	4.61711	4.8807	-1.20047	0.0188499
TC07000153.hg.1	NPY	4852	3.83211	4.00854	-1.13009	0.0464201
TC11003302.hg.1	---	---	4.30019	4.0343	1.20238	0.0182807
TC09002662.hg.1	---	---	4.58798	4.21823	1.29213	0.0273131
TC03002277.hg.1	---	---	4.20123	3.88261	1.24714	0.033106
TC07002879.hg.1	---	---	4.25581	3.85137	1.32357	0.0124059
TC11002809.hg.1	---	---	5.41963	5.02228	1.31709	0.0106112
TC06002504.hg.1	---	---	3.23932	2.9559	1.21708	0.0173265
TC06003390.hg.1	---	---	2.24022	2.39832	-1.11582	0.033659
TC17002247.hg.1	---	---	4.15672	3.93958	1.16243	0.048441
TC12000778.hg.1	NR1H4	9971	2.30809	2.4419	-1.09719	0.0348424
TC17_ctg5_hap1000015.hg.1	NSF	4905	4.02831	3.81702	1.15772	0.0400531
TC05002839.hg.1	NSUN2	54888	4.10851	3.89634	1.15843	0.0493751
TC10002961.hg.1	NSUN6	221078	3.96606	3.63961	1.25392	0.00930396
TC07001264.hg.1	NT5C3A	51251	3.67261	3.39662	1.21082	0.0195407
TC01000355.hg.1	NUDC	10726	4.34942	4.16507	1.1363	0.0279987
TC16001133.hg.1	NUDT21	11051	5.58498	5.11942	1.38085	0.0308216
TC01001430.hg.1	NUF2	83540	4.00768	3.68219	1.25309	0.0176332
TC13000626.hg.1	NUFIP1	26747	4.1235	3.84103	1.21627	0.0204813
TC12000602.hg.1	NUP107	57122	4.17837	3.81315	1.28809	0.017886
TC06001295.hg.1	NUP153	9972	4.86405	4.6001	1.20077	0.0250044
TC05001275.hg.1	NUP155	9631	4.13892	3.86358	1.21027	0.0267118
TC09002909.hg.1	NUP188	23511	4.07026	3.9055	1.12098	0.031765
TC07002605.hg.1	NUP205	23165	4.18882	3.93268	1.19428	0.0221696
TC07000843.hg.1	NUP205	23165	4.178	3.93873	1.1804	0.0270908
TC09000746.hg.1	NUP214	8021	4.45871	4.26882	1.14068	0.0207317
TC12001887.hg.1	NUP37	79023	4.44275	4.16513	1.21219	0.0418444
TC13000064.hg.1	NUP58	9818	4.17542	3.94184	1.17575	0.0332725
TC16000477.hg.1	NUP93	9688	4.12846	3.88522	1.18365	0.00953488
TC11001302.hg.1	NUP98	4928	4.27038	4.0503	1.16479	0.0241973
TC06000932.hg.1	NUS1	116150	4.12283	3.83644	1.21958	0.0164867
TC12000886.hg.1	OAS2	4939	3.26613	3.454	-1.13908	0.0317592
TC01001605.hg.1	OCLM	10896	3.0435	2.69712	1.27137	0.0180484
TC02001570.hg.1	ODC1	4953	5.40063	5.03328	1.28997	0.0137692
TC22001501.hg.1	ODF3B	440836	4.90301	5.23727	-1.26074	0.0402125
TC03001067.hg.1	OPA1	4976	4.30952	4.03472	1.20983	0.0317272
TC11002464.hg.1	OPCML-IT1	100874333	2.10428	2.34396	-1.18073	0.024581
TC11003425.hg.1	OPCML-IT1	100874333	2.05648	2.25996	-1.15148	0.0367731
TC11001379.hg.1	OR10A6	390093	1.65709	1.89192	-1.17677	0.0468292
TC11002927.hg.1	OR10D3	26497	2.39614	2.67736	-1.21522	0.0438424
TC01001344.hg.1	OR10Z1	128368	3.19589	3.42225	-1.16988	0.0481036
TC14000049.hg.1	OR11H4	390442	1.53845	1.80561	-1.20344	0.0293826
TC17002445.hg.1	OR1G1	8390	3.18597	3.4079	-1.16629	0.0342773
TC06002355.hg.1	OR2J2	26707	6.78652	7.74777	-1.947	0.0196526
TC01004086.hg.1	OR2T34	127068	3.41775	3.70572	-1.22091	0.0206713
TC11000104.hg.1	OR51A7	119687	2.91621	2.62144	1.22669	0.0407836
TC19001142.hg.1	OR7G1	125962	6.45825	6.82687	-1.29111	0.0400354
TC11001772.hg.1	OR8J3	81168	1.63152	1.83202	-1.14909	0.0307754
TC02004778.hg.1	ORC2	4999	4.36052	3.96774	1.31292	0.0100964
TC02002669.hg.1	ORC2	4999	4.04561	3.74594	1.23087	0.0124592
TC02002408.hg.1	ORC4	5000	3.60297	3.35717	1.18575	0.0269298
TC07001724.hg.1	ORC5	5001	3.29046	3.06994	1.16516	0.0219204
TC18000418.hg.1	OSBPL1A	114876	4.1129	3.88338	1.17245	0.0259218
TC12001754.hg.1	OSBPL8	114882	4.56644	4.21944	1.27191	0.0178558
TC20001230.hg.1	OSER1-AS1	100505783	3.03963	3.1895	-1.10946	0.0399252
TC09001885.hg.1	---	---	3.00597	3.23025	-1.1682	0.034774
TC01005374.hg.1	---	---	2.14332	2.36895	-1.16929	0.0408916
TC01004277.hg.1	---	---	2.70861	2.92687	-1.16334	0.0340458
TC01004189.hg.1	---	---	3.02722	3.24649	-1.16414	0.0316852
TC01005619.hg.1	---	---	1.84028	2.10916	-1.20487	0.0400959
TC06002808.hg.1	---	---	2.93779	3.18779	-1.18921	0.0123368
TC06003688.hg.1	---	---	1.80997	2.07082	-1.19818	0.0198864
TC06003707.hg.1	---	---	1.797	2.00992	-1.15903	0.0266841
TC06002870.hg.1	---	---	1.73026	1.9717	-1.18217	0.0453172
TC06003732.hg.1	---	---	1.50825	1.79912	-1.22338	0.017693
TC06002947.hg.1	---	---	2.12629	2.45922	-1.25957	0.0117812
TC06003092.hg.1	---	---	1.49122	1.72133	-1.17292	0.0447776
TC06003116.hg.1	---	---	3.42323	3.15311	1.20591	0.0425152
TC13001481.hg.1	---	---	1.37187	1.70241	-1.25748	0.0141445
TC13001616.hg.1	---	---	1.95935	2.2286	-1.20519	0.0357257
TC10001840.hg.1	---	---	1.87399	2.09373	-1.16453	0.0451784
TC10002570.hg.1	---	---	5.36584	5.96304	-1.51277	0.0317946
TC10002644.hg.1	---	---	1.57867	1.79072	-1.15833	0.0369355
TC10002675.hg.1	---	---	1.59286	1.83949	-1.18643	0.0273433
TC10002382.hg.1	---	---	5.45254	5.76049	-1.23794	0.0474293
TC09001805.hg.1	---	---	3.37599	3.17807	1.14704	0.0474648
TC09002644.hg.1	---	---	2.57392	2.80849	-1.17656	0.040684
TC09002674.hg.1	---	---	5.29897	5.65639	-1.28114	0.0124036
TC09002117.hg.1	---	---	1.56803	1.80375	-1.1775	0.0331109
TC0X002019.hg.1	---	---	2.0423	2.30306	-1.19811	0.0358891
TC0X002049.hg.1	---	---	1.42565	1.79828	-1.29471	0.014837
TC0X002167.hg.1	---	---	1.53501	1.74932	-1.16015	0.0483849
TC0X000531.hg.1	---	---	2.17732	2.37952	-1.15045	0.0434861
TC0X002262.hg.1	---	---	6.73991	7.20074	-1.37633	0.033666
TC0X002110.hg.1	---	---	2.59023	2.77625	-1.13762	0.0307476
TC20001105.hg.1	---	---	1.84519	2.10438	-1.19681	0.0358045
TC20001233.hg.1	---	---	1.93737	2.18889	-1.19046	0.0449588
TC20001596.hg.1	---	---	1.53638	1.77012	-1.17588	0.0452055
TC01005931.hg.1	---	---	1.58829	1.81378	-1.16917	0.0485737
TC01006166.hg.1	---	---	3.72932	3.3037	1.34315	0.0166738
TC01006222.hg.1	---	---	1.61753	1.92832	-1.24038	0.017448
TC01005200.hg.1	---	---	5.17116	5.44408	-1.20825	0.0227888
TC01005953.hg.1	---	---	2.99889	3.1909	-1.14235	0.0333361
TC01005792.hg.1	---	---	3.07602	2.79727	1.21314	0.0316402
TC01004694.hg.1	---	---	3.36386	2.91814	1.36199	0.0160258
TC13001395.hg.1	---	---	1.56375	1.88601	-1.25029	0.0160388
TC17002104.hg.1	---	---	3.24959	3.43404	-1.13639	0.0497624
TC17002099.hg.1	---	---	4.43843	4.65315	-1.16048	0.0412139
TC21000867.hg.1	---	---	1.6812	1.93543	-1.1927	0.0408699
TC15002664.hg.1	---	---	3.77882	3.47246	1.23658	0.0166066
TC15001281.hg.1	---	---	3.60589	3.26376	1.26762	0.0403315
TC02003840.hg.1	---	---	1.85244	2.11475	-1.1994	0.024116
TC11003194.hg.1	---	---	3.48133	3.76252	-1.21519	0.0129984
TC08002633.hg.1	---	---	3.69833	3.93827	-1.18094	0.0173888
TC22001265.hg.1	---	---	1.67689	1.96279	-1.21917	0.0238961
TC07002657.hg.1	---	---	1.69506	1.94104	-1.1859	0.0324989
TC02004028.hg.1	---	---	2.05111	2.36492	-1.24299	0.0145043
TC02004060.hg.1	---	---	1.76272	2.01555	-1.19154	0.0165988
TC02003180.hg.1	---	---	5.21802	5.5863	-1.29082	0.0169168
TC07002713.hg.1	---	---	4.13518	3.71435	1.3387	0.00937255
TC02004287.hg.1	---	---	2.07093	2.3105	-1.18064	0.0326652
TC02003363.hg.1	---	---	1.33632	1.63773	-1.23235	0.0407556
TC02003549.hg.1	---	---	4.71208	5.02047	-1.23833	0.0369899
TC09002337.hg.1	---	---	3.46863	3.75833	-1.22238	0.040586
TC04001678.hg.1	---	---	1.53974	1.87087	-1.258	0.0109585
TC04000718.hg.1	---	---	4.26945	3.61609	1.57282	0.0117636
TC04000795.hg.1	---	---	2.83625	2.43008	1.32516	0.0156159
TC08001561.hg.1	---	---	3.49121	3.05995	1.3484	0.00953903
TC08000553.hg.1	OTUD6B	51633	4.26145	3.97467	1.21991	0.0189672
TC03000102.hg.1	OXNAD1	92106	3.8607	3.66144	1.14811	0.0241035
TC08002060.hg.1	OXR1	55074	4.27401	4.57229	-1.22967	0.0474318
TC03000188.hg.1	OXSR1	9943	3.98773	3.74154	1.18607	0.010959
TC20001065.hg.1	OXT	5020	5.16842	5.62319	-1.37056	0.0468588
TC03002609.hg.1	P2RY1	5028	4.97038	4.40639	1.47835	0.00908333
TC12003244.hg.1	PA2G4	5036	5.70937	5.41465	1.22665	0.0205707
TC04000331.hg.1	PAICS	10606	4.81867	4.52232	1.22803	0.0208204
TC03001100.hg.1	PAK2	5062	4.40744	4.08128	1.25367	0.0148073
TC19000537.hg.1	PAK4	10298	4.47077	4.67187	-1.14958	0.0483584
TC13000516.hg.1	PAN3-AS1	100288730	3.57981	3.85027	-1.20619	0.0373746
TC20001070.hg.1	---	---	6.85328	6.09412	1.6925	0.00941969
TC20000046.hg.1	---	---	5.78637	5.15936	1.54435	0.00976331
TC20000044.hg.1	PANK2	80025	4.20598	4.02068	1.13706	0.0492308
TC05003104.hg.1	---	---	4.41536	3.90453	1.42487	0.0100905
TC14000605.hg.1	PAPOLA	10914	5.24961	4.85454	1.31502	0.0150931
TC04001325.hg.1	PAQR3	152559	3.63265	3.41308	1.16438	0.0240552
TC18000793.hg.1	PARD6G-AS1	100130522	3.10305	3.31277	-1.15647	0.0317006
TC12000795.hg.1	PARPBP	55010	3.70226	3.42571	1.21129	0.0224562
TC11001829.hg.1	PATL1	219988	4.5795	4.36542	1.15996	0.0218465
TC10000725.hg.1	PAX2	5076	4.48967	4.6773	-1.13889	0.0371286
TC02002222.hg.1	PAX8	7849	4.04076	4.18073	-1.10188	0.0354734
TC21000925.hg.1	PAXBP1	94104	4.23444	3.89079	1.26897	0.014837
TC21000401.hg.1	PAXBP1	94104	4.07367	3.83899	1.17664	0.0474311
TC09002258.hg.1	PBX3	5090	4.26573	4.01861	1.18683	0.016236
TC05000754.hg.1	PCDHB11	56125	2.0474	2.2381	-1.14131	0.0124592
TC05000750.hg.1	PCDHB8	56128	2.29063	2.53994	-1.18864	0.0263467
TC06001085.hg.1	PCMT1	5110	4.43064	4.18031	1.18948	0.0321044
TC03000519.hg.1	PCNP	57092	5.4227	5.08519	1.26357	0.0139853
TC14000361.hg.1	PCNXL4	64430	4.54291	4.16225	1.30194	0.0100845
TC07001673.hg.1	PCOLCE-AS1	100129845	3.90292	4.04497	-1.10347	0.0376002
TC01001384.hg.1	PCP4L1	654790	3.90919	4.1452	-1.17773	0.0240138
TC0X001017.hg.1	PCSK1N	27344	4.35719	4.63059	-1.20865	0.0446752
TC03001976.hg.1	PDCD10	11235	4.91224	4.60978	1.23324	0.0471299
TC10000808.hg.1	PDCD4	27250	5.43159	4.94003	1.40596	0.0122913
TC03002278.hg.1	PDCD6IP	10015	4.92424	4.56861	1.27954	0.0099084
TC03000168.hg.1	PDCD6IP	10015	4.31044	4.06823	1.1828	0.0270132
TC15000152.hg.1	PDCD6IPP2	646278	4.67185	4.35186	1.24832	0.0100411
TC15002109.hg.1	PDCD6IPP2	100289656	4.15219	3.92846	1.16775	0.0121544
TC01000733.hg.1	PDE4B	5142	2.8554	3.01167	-1.1144	0.0377822
TC05001389.hg.1	PDE4D	5144	3.13187	2.96184	1.12508	0.0189582
TC0X001627.hg.1	PDK3	5165	4.27682	3.96083	1.24487	0.0331891
TC05000632.hg.1	PDLIM4	8572	3.9854	4.16847	-1.1353	0.0493656
TC04001134.hg.1	PDS5A	23244	4.53875	4.25395	1.21824	0.0273217
TC13000112.hg.1	PDS5B	23047	4.49759	4.21784	1.21399	0.0229151
TC16000186.hg.1	PDXDC1	23042	4.2866	4.09902	1.13885	0.0182893
TC16001940.hg.1	PDXDC2P	283970	4.65446	4.38407	1.20613	0.0130265
TC10001688.hg.1	PDZD8	118987	5.03627	4.62923	1.32596	0.00953333
TC01003095.hg.1	PFN1P2	767846	4.45553	4.12535	1.25717	0.0379916
TC01003956.hg.1	PGBD5	79605	3.47588	3.61525	-1.10142	0.0468832
TC05001687.hg.1	PGGT1B	5229	4.44062	4.08518	1.27937	0.0217938
TC03003204.hg.1	PHC3	80012	4.17669	3.7103	1.38164	0.0257643
TC0X000635.hg.1	PHF6	84295	4.24579	3.8999	1.27093	0.0260417
TC15000280.hg.1	PHGR1	644844	4.33806	4.6603	-1.25027	0.0189144
TC06001895.hg.1	PHIP	55023	4.74707	4.44401	1.23376	0.0207453
TC01003691.hg.1	PHLDA3	23612	4.91161	5.15542	-1.18411	0.0235489
TC04001146.hg.1	PHOX2B	8929	3.38282	3.57862	-1.14536	0.017833
TC12001148.hg.1	PIANP	196500	4.76613	5.0396	-1.20871	0.00935433
TC11002165.hg.1	PICALM	8301	4.85383	4.46584	1.30857	0.0099375
TC18000324.hg.1	PIEZO2	63895	3.70085	3.43369	1.20343	0.00996078
TC18000833.hg.1	PIEZO2	63895	3.69035	3.39191	1.22982	0.0121573
TC18000552.hg.1	PIGN	23556	3.76322	3.50844	1.19315	0.047641
TC03000951.hg.1	PIK3CA	5290	4.09193	3.78013	1.24126	0.00959207
TC03001778.hg.1	PIK3R4	30849	3.57564	3.34519	1.17319	0.0104725
TC09000316.hg.1	PIP5K1B	8395	3.52365	3.32113	1.1507	0.0360274
TC01005614.hg.1	PKN2	5586	4.80455	4.31399	1.40499	0.0129792
TC01000831.hg.1	PKN2	5586	4.35847	4.07069	1.22076	0.0214345
TC09000983.hg.1	PLAA	9373	4.08764	3.87124	1.16183	0.040749
TC02001074.hg.1	PLEKHA3	65977	4.15148	3.89659	1.19325	0.0133969
TC07002229.hg.1	PLEKHA8	84725	3.59259	3.19849	1.31413	0.0166675
TC08000583.hg.1	PLEKHF2	79666	4.42858	4.19211	1.17811	0.0191613
TC17001538.hg.1	PLEKHH3	79990	4.26658	4.41917	-1.11156	0.0485637
TC04000645.hg.1	PLK4	10733	3.76782	3.51534	1.19125	0.0485971
TC12000730.hg.1	PLXNC1	10154	4.11531	3.84455	1.20645	0.032891
TC12002520.hg.1	PLXNC1	10154	4.23325	3.92486	1.23833	0.0408198
TC12001888.hg.1	PMCH	5367	4.12747	3.65029	1.39202	0.0165854
TC17001157.hg.1	PMP22	5376	3.95585	3.76306	1.14297	0.0251759
TC07002777.hg.1	PMS2	5395	3.99214	3.7525	1.1807	0.0170464
TC07001124.hg.1	PMS2	5395	3.81605	3.61494	1.14958	0.0207321
TC07003082.hg.1	PMS2P1	5379	4.9002	4.57486	1.25295	0.01652
TC07001666.hg.1	PMS2P1	5379	4.84497	4.53532	1.23941	0.0314823
TC07003030.hg.1	PMS2P3	5387	5.25525	4.84924	1.32501	0.00969461
TC07001532.hg.1	PMS2P3	5387	5.22621	4.9438	1.21622	0.0190242
TC07001469.hg.1	PMS2P4	5382	4.5583	4.27365	1.21811	0.0392572
TC07002409.hg.1	PMS2P5	5383	5.17364	4.86771	1.23621	0.0367815
TC14001663.hg.1	PNN	5411	6.39075	5.85205	1.45267	0.0325923
TC0X000120.hg.1	POLA1	5422	4.29451	3.94358	1.27539	0.00957303
TC03001695.hg.1	POLQ	10721	3.60043	3.32877	1.2072	0.0123352
TC04000336.hg.1	POLR2B	5431	4.74613	4.40904	1.26321	0.0103953
TC05000441.hg.1	POLR3G	10622	3.86601	3.64718	1.16379	0.0400877
TC12002879.hg.1	POU6F1	5463	3.74588	3.92566	-1.13272	0.0171544
TC12001505.hg.1	POU6F1	5463	3.52112	3.6554	-1.09754	0.0258346
TC04001220.hg.1	PPAT	5471	4.0486	3.83358	1.16072	0.0411407
TC04001686.hg.1	PPID	5481	4.66934	4.35633	1.2423	0.0306453
TC02001004.hg.1	PPIG	9360	4.93756	4.60393	1.26018	0.0334197
TC06002210.hg.1	PPIL4	85313	4.62868	4.2718	1.28066	0.0165066
TC14001720.hg.1	PPM1A	5494	3.71258	3.32751	1.30593	0.0191041
TC14000362.hg.1	PPM1A	5494	4.3943	4.17049	1.16781	0.0439679
TC02000274.hg.1	PPM1B	5495	3.93595	3.69675	1.18034	0.0196688
TC02001685.hg.1	PPM1G	5496	4.60518	4.41599	1.14013	0.0399246
TC11000784.hg.1	PPME1	51400	3.81405	3.62348	1.14121	0.0340589
TC12001766.hg.1	PPP1R12A	4659	4.48437	4.18913	1.22709	0.0367886
TC15001244.hg.1	PPP1R14D	54866	4.0597	4.2551	-1.14504	0.0427953
TC6_qbl_hap6000129.hg.1	PPP1R18	170954	4.69084	4.85774	-1.12265	0.0381318
TC6_cox_hap2000139.hg.1	PPP1R18	170954	4.66223	4.83286	-1.12555	0.040063
TC6_apd_hap1000075.hg.1	PPP1R18	170954	4.61356	4.77651	-1.11957	0.0480629
TC6_dbb_hap3000128.hg.1	PPP1R18	170954	4.61356	4.77651	-1.11957	0.0480629
TC6_mann_hap4000117.hg.1	PPP1R18	170954	4.61422	4.77339	-1.11664	0.0494145
TC6_mcf_hap5000118.hg.1	PPP1R18	170954	4.61422	4.77339	-1.11664	0.0494145
TC12001574.hg.1	PPP1R1A	5502	4.10542	4.31272	-1.15453	0.0476057
TC08002584.hg.1	PPP1R42	286187	1.61363	1.78759	-1.12816	0.0317178
TC05003406.hg.1	PPP2CA	5515	4.44418	4.1825	1.19888	0.0328462
TC04001425.hg.1	PPP3CA	5530	4.70048	4.43501	1.20203	0.0123429
TC02005028.hg.1	PPP3R1	5534	4.66059	4.26651	1.31411	0.0107974
TC09001424.hg.1	PPP3R2	5535	2.93615	3.1235	-1.13867	0.0481178
TC03003360.hg.1	PPP4R2	151987	4.25561	4.04502	1.15717	0.0317663
TC02001864.hg.1	PPP4R3B	57223	4.3084	4.0541	1.19276	0.0416242
TC09001588.hg.1	PPP6C	5537	4.61375	4.29231	1.24957	0.0123339
TC05000277.hg.1	PPWD1	23398	4.26663	3.96148	1.23554	0.0271091
TC01000178.hg.1	PRAMEF17	391004	2.63223	2.87531	-1.18352	0.046056
TC12003274.hg.1	PRB1	5542	4.23456	4.41133	-1.13035	0.0476446
TC12002764.hg.1	PRB4	5545	3.88717	4.07333	-1.13773	0.0276522
TC15001858.hg.1	PRC1	9055	4.49445	4.17649	1.24656	0.0275336
TC11003481.hg.1	PRG2	5553	4.50873	4.20329	1.2358	0.0319902
TC17002331.hg.1	PRKAR1A	5573	6.33808	5.65351	1.60722	0.0205806
TC07000688.hg.1	PRKAR2B	5577	4.52674	4.0763	1.36645	0.0217551
TC03000914.hg.1	PRKCI	5584	3.89747	3.66391	1.17573	0.0281967
TC08001191.hg.1	PRKDC	5591	4.45226	4.10436	1.27271	0.0106502
TC11002110.hg.1	PRKRIR	5612	4.67854	4.49602	1.13487	0.0479242
TC04001625.hg.1	PRMT9	90826	3.3224	3.04161	1.21486	0.0130016
TC20000051.hg.1	PRNP	5621	4.07729	4.24389	-1.12241	0.031731
TC01000406.hg.1	PRO0611	28997	4.84029	4.09523	1.67605	0.009173
TC01005075.hg.1	PRO2012	55478	3.26397	2.90544	1.28212	0.0164595
TC01000932.hg.1	PRPF38B	55119	4.72256	4.40476	1.24642	0.0137692
TC02002434.hg.1	PRPF40A	55660	4.67593	4.41172	1.20098	0.0339919
TC06000035.hg.1	PRPF4B	8899	4.19781	3.92941	1.20447	0.0410543
TC17000718.hg.1	PRR11	55771	4.16692	3.90474	1.19929	0.0403934
TC05000608.hg.1	PRRC1	133619	4.78026	4.56716	1.15918	0.0363388
TC06004145.hg.1	PRRT1	80863	3.86646	4.09075	-1.1682	0.0258367
TC6_apd_hap1000127.hg.1	PRRT1	80863	3.86646	4.09075	-1.1682	0.0258367
TC6_cox_hap2000262.hg.1	PRRT1	80863	3.86646	4.09075	-1.1682	0.0258367
TC6_dbb_hap3000239.hg.1	PRRT1	80863	3.86646	4.09075	-1.1682	0.0258367
TC6_mann_hap4000207.hg.1	PRRT1	80863	3.86646	4.09075	-1.1682	0.0258367
TC6_mcf_hap5000222.hg.1	PRRT1	80863	3.86646	4.09075	-1.1682	0.0258367
TC6_qbl_hap6000234.hg.1	PRRT1	80863	3.86646	4.09075	-1.1682	0.0258367
TC6_ssto_hap7000211.hg.1	PRRT1	80863	3.86646	4.09075	-1.1682	0.0258367
TC07001845.hg.1	PRRT4	401399	4.55661	4.75895	-1.15057	0.0465007
TC16000794.hg.1	PRSS30P	124221	4.35032	4.49862	-1.10826	0.0426934
TC0Y000199.hg.1	PRY	9081	3.47108	3.661	-1.14069	0.041327
TC10001374.hg.1	PSAP	5660	4.96941	4.77956	1.14064	0.031142
TC14001708.hg.1	PSMA3	5684	5.32551	4.89231	1.35022	0.0394691
TC14000346.hg.1	PSMA3	5684	4.73526	4.34688	1.30892	0.0400727
TC14000309.hg.1	PSMC6	5706	4.21377	3.82489	1.30938	0.0123168
TC02003882.hg.1	PSMD1	5707	4.54736	4.26087	1.21967	0.0322638
TC17001813.hg.1	PSMD12	5718	4.63017	4.25471	1.29725	0.00957692
TC02000970.hg.1	PSMD14	10213	4.60423	4.34028	1.20076	0.0281283
TC02001848.hg.1	PSME4	23198	4.17707	3.88995	1.2202	0.0186808
TC21000458.hg.1	PSMG1	8624	4.87942	4.61225	1.20344	0.0265118
TC18000477.hg.1	PSTPIP2	9050	3.97584	3.64927	1.25403	0.0184742
TC01000883.hg.1	PTBP2	58155	4.31317	4.08425	1.17196	0.0375815
TC09001488.hg.1	PTBP3	9991	4.93172	4.61494	1.24555	0.0264724
TC02000520.hg.1	PTCD3	55037	4.43711	4.11179	1.25295	0.00960811
TC09002910.hg.1	PTGDS	5730	4.13364	4.27723	-1.10465	0.0281891
[truncated: 961 more rows]
